# Supplementary material
Source: PubMed Central journal article supplement (PMC7686082)
Supplement: NIHMS1638722-supplement-Supplemental_Material.pdf [file NIHMS1638722-supplement-Supplemental_Material.pdf]

**SUPPLEMENTARY MATERIAL**

**Proteomic Evaluation of the Comorbidity-Inflammation Paradigm  
in Heart Failure with Preserved Ejection Fraction:  
*Results from the PROMIS-HFpEF Study***

Sandra Sanders-van Wijk, MD, PhD; Jasper Tromp, MD, PhD;  
Lauren Beussink-Nelson, MHS; Camilla Hage, PhD; Sara Svedlund, MD;  
Antti Saraste, MD; Stanley A. Swat, MD; Cynthia Sanchez, BA; Joyce Njoroge, MD;  
Ru-San Tan, MD; Maria Lagerström Fermer, MD; Li-Ming Gan, MD, PhD;  
Lars H. Lund, MD, PhD; Carolyn S.P. Lam, MD;  
Sanjiv J. Shah, MD

## **SUPPLEMENTAL METHODS**

### ***Biomarker measurement and internal validation***

The Olink Proseek multiplex immunoassay is based on a proximity extension assay, using target-specific antibody pairs that are linked to DNA strands, creating a real-time polymerase chain reaction amplicon upon binding to the target analyte in a proximity-dependent manner, enabled by the action of a DNA polymerase. The intra-assay coefficient of variation (CV) ranges between 5% and 13% (mean 8%); the inter-assay CV ranges between 9% and 39% (mean 15%). Batch-effects were excluded and random partitioning of samples was confirmed. Ten biomarkers were measured on 2 panels (CCL3, CXCL1, OPG, IL-6, uPA, MCP1, SCF, IL-18, FGF-21, FGF-23). The correlation between panels for these paired-biomarkers ranged from 0.87 to 0.97 in both cohorts. For further analysis, we randomly selected 1 panel for each of these paired-biomarkers. The correlation between NTproBNP using Olink-technology and using a commercially available ELISA immunoassay (Elecsys® NT-proBNP assay, Roche Diagnostics GmbH, Mannheim) was 0.89 ( $P < 0.001$ ) in both cohorts. When biomarker levels fell below limit of detection (LOD) in  $\geq 50\%$  of the study population, they were excluded from further analysis (n=18: IL-20RA, IL-2RB, IL-1 alpha, IL-2, TSLP, FGF-5, IL-22RA1, IL-24, IL-13, ARTN, TNF, IL-20, IL-33, IFN-gamma, IL4, LIF, NRTN, IL-5).

### ***Linear regression models***

The main assumptions of linear regression were checked (i.e. linearity, homogeneity of variance, normal distribution of residuals) by evaluating Q-Q plots and scatterplots of fitted values versus residuals. Regression models with the endpoint of LA volume and LA volume index showed non-normal distributed Q-Q plots. Log-transformation was attempted, but did not change overall results in terms of  $R^2$  or p-value. Therefore and for easier interpretability, non-transformed results are reported. Outliers were evaluated using standardized and studentized residuals and

influential cases were evaluated by Cook's distance, Hat-values, DFbeta and DFFit; none of models suffered from relevant outliers or influential cases.

### ***Confounders***

We evaluated several variables based on clinical insight and based on baseline differences by comorbidity burden (i.e. age, gender, GFR, atrial fibrillation, NYHA-class, inflammatory disease and/or malignancy, active malignancy, BMI, use of a statin and use of a loop diuretic) and found that age, gender, and GFR were potential confounders for the association between comorbidity burden and cardiac structure & function and/or between comorbidity burden and inflammation. Additionally, atrial fibrillation was a confounder for regression analyses including e' velocity, E/e' ratio and left atrial parameters as an endpoint. Active malignancy was a potential confounder for regression analyses including PC6 and the yellow cluster, inflammatory disease and previous malignancy were not, but we corrected for them in the regressions for inflammation anyway. Study site was entered as a dummy variable in all regression and mediation analyses because of the many differences in baseline characteristics by study site (e.g. BMI, PC6, yellow-ME, LV-dimensions, LAVI, LA-strain, GLS, e' velocity, RV-dimensions, RV-function)

### ***Principal component analysis (PCA) of inflammation markers***

After mean centering and scaling, rotated PCA (oblimin, package 'psych') was performed in order to extract principal components (PCs) and as a means of data reduction. Rotation maximizes the loading of biomarkers on a single PC while minimizing the loading on all other PCs. The oblique method was chosen because the inflammatory biomarker PCs are expected to be correlated (and not fully orthogonal) and because rotation improves factor interpretability. Six rotated principal components (PCs) were extracted, as suggested by the scree plot in unrotated PCA. These rotated components respectively explained 19%, 10%, 8%, 7%, 5% and 8% of biomarker variation. Rotated PC1 and PC6 had a correlation of 0.41, other PCs correlated <0.30.

### ***Functional classification and pathway overrepresentation analysis in Metascape:***

Biomarkers were entered into the online Metascape application according to their corresponding Entrez Gene ID (see supplemental table I) and analyzed as 'homo sapiens'. For both membership analysis and pathway overrepresentation analysis, three databases were used: i) Gene Ontology (GO), the primary data source for enrichment analysis, using the ontology branch "Biological Process" (BP), <http://geneontology.org>; ii) Kyoto Encyclopedia of Genes and Genomes (KEGG), similar and complementary to GO, also contains some compound data, <http://www.genome.jp/kegg>; and iii) Reactome, a curated and peer reviewed pathway database used for enrichment analysis, <http://www.reactome.org> (accessed on March 18, 2019). Membership analysis was performed applying keyword searches followed by manual selection of specific pathways to the total available list of Olink-biomarkers in each of these databases (supplemental table II). Biomarkers that were annotated to any of these selected pathways in three out of three databases were finally selected. Pathway overrepresentation analysis was performed applying the standard accumulative hypergeometric statistical test to identify pathways where input genes show significant presence, automatically clustering resultant terms to reduce redundancy. The total included list of Olink-biomarkers was used as a background-list instead of using the whole genome, since our study was conducted using a functionally biased protein-collection. For small clusters (<20 biomarkers), an enriched protein-protein-interaction network was additionally constructed using the STRING database (a database of known and predicted interactions based on the literature, experimental data and computational prediction methods) and the following parameters: confidence cut-off = 0.80, maximum added interactors = 15.

### ***Weighted coexpression network analysis***

Using the WGCNA package in R, weighted correlations were calculated for all pairs of biomarkers, creating a signed similarity matrix. The similarity matrix was then raised to the power

$\beta$  of 6 to approximate a scale-free topology of the topological overlap connectivity ( $k$ ) of the entire network. This is performed to emphasize strong correlations and reduce the emphasis of weak correlations on an exponential scale. The resulting adjacency matrix is then transformed into a topological overlap matrix (TOM). Using TOM as the distance measure, biomarkers were hierarchically clustered, and clusters were determined using a dynamic tree-cutting algorithm (cutreeHybrid, using the following parameters except deepSplit = 4, cutHeight = 0.25, minClusterSize = 10, reassignThreshold = 0, other settings are default). The resulting clusters or clusters of coexpressed biomarkers were used to calculate the MEs, i.e. the first principal component of the cluster. Cluster preservation analysis was performed by first constructing WCNA networks and clusters in the Northwestern-HFpEF and Northwestern-control dataset individually and independently. Cluster hubs were defined by calculating in-cluster protein connectivity, which represent the sum of the weighed correlations with all biomarkers in the cluster. Cluster membership (kME) - which are the Pearson correlations between each biomarker and each ME - was also calculated and used in network plots. Network comparative analysis were done using a hypergeometric distribution, testing if the number of overlapping biomarkers between one dataset and a given cluster was significantly large with any cluster in the other dataset. Accordingly, corresponding clusters were assigned the same color.

## SUPPLEMENTARY TABLES

**Supplementary Table I: Full listing of the Olink proteins included in the study (CVD2, CVD3, and Inflammation panels)**

| Protein abbreviation | Gene name | Entez ID | Protein full name                                                             | Selected as inflammation-related | Assigned cluster |                    |                       |
|----------------------|-----------|----------|-------------------------------------------------------------------------------|----------------------------------|------------------|--------------------|-----------------------|
|                      |           |          |                                                                               |                                  | PROMIS HFpEF     | Northwestern HFpEF | Northwestern Controls |
| ACE2                 | ACE2      | 59272    | Angiotensin-converting enzyme 2 (ACE2)                                        |                                  | —                | turquoise          | —                     |
| ADA                  | ADA       | 100      | Adenosine Deaminase (ADA)                                                     |                                  | blue             | blue               | —                     |
| ADAMTS13             | ADAMTS13  | 11093    | A disintegrin and metalloproteinase with thrombospondin motifs 13 (ADAM-TS13) |                                  | brown            | blue               | blue                  |
| ADM                  | ADM       | 133      | ADM (ADM)                                                                     |                                  | brown            | turquoise          | turquoise3            |
| AGRP                 | AGRP      | 181      | Agouti-related protein (AGRP)                                                 |                                  | brown            | turquoise          | —                     |
| ALCAM                | ALCAM     | 214      | CD166 antigen (ALCAM)                                                         |                                  | yellow           | turquoise          | turquoise2            |
| AMBP                 | AMBP      | 259      | Protein AMBP (AMBP)                                                           |                                  | brown            | turquoise          | turquoise3            |
| ANG1                 | ANGPT1    | 284      | Angiopoietin-1 (ANG-1)                                                        |                                  | blue             | purple             | purple                |
| APN                  | ANPEP     | 290      | Aminopeptidase N (AP-N)                                                       |                                  | —                | turquoise          | —                     |
| AXIN1                | AXIN1     | 8312     | Axin-1 (AXIN1)                                                                |                                  | blue             | blue               | blue                  |
| AXL                  | AXL       | 558      | Tyrosine-protein kinase receptor UFO (AXL)                                    |                                  | turquoise        | turquoise          | turquoise2            |
| AZU1                 | AZU1      | 566      | Azurocidin (AZU1)                                                             |                                  | turquoise        | orange             | orange                |
| BetaNGF              | NGF       | 4803     | Beta-nerve growth factor (Beta-NGF)                                           |                                  | —                | turquoise          | —                     |
| BLMH                 | BLMH      | 642      | Bleomycin hydrolase (BLM hydrolase)                                           |                                  | blue             | blue               | blue                  |
| BMP6                 | BMP6      | 654      | Bone morphogenetic protein 6 (BMP—6)                                          |                                  | brown            | turquoise          | turquoise2            |

| Protein abbreviation | Gene name | Entez ID | Protein full name                                            | Selected as inflammation-related | Assigned cluster |                    |                       |
|----------------------|-----------|----------|--------------------------------------------------------------|----------------------------------|------------------|--------------------|-----------------------|
|                      |           |          |                                                              |                                  | PROMIS HFpEF     | Northwestern HFpEF | Northwestern Controls |
| BNP                  | NPPB      | 4879     | Natriuretic peptides B (BNP)                                 |                                  | —                | turquoise          | —                     |
| BOC                  | BOC       | 91653    | Brother of CDO (Protein BOC)                                 |                                  | brown            | turquoise          | purple                |
| CA5A                 | CA5A      | 763      | Carbonic anhydrase 5A, mitochondrial (CA5A)                  |                                  | —                | turquoise          | —                     |
| CASP3                | CASP3     | 836      | Caspase-3 (CASP-3)                                           |                                  | blue             | blue               | blue                  |
| CASP8                | CASP8     | 841      | Caspase 8 (CASP-8)                                           | X                                | blue             | blue               | orange                |
| CCL11                | CCL11     | 6356     | Eotaxin-1 (CCL11)                                            | X                                | —                | —                  | —                     |
| CCL15                | CCL15     | 6359     | C-C motif chemokine 15 (CCL15)                               |                                  | turquoise        | turquoise          | —                     |
| CCL16                | CCL16     | 6360     | C-C motif chemokine 16 (CCL16)                               |                                  | —                | —                  | —                     |
| CCL17                | CCL17     | 6361     | C-C motif chemokine 17 (CCL17)                               |                                  | blue             | purple             | purple                |
| CCL19                | CCL19     | 6363     | C-C motif chemokine 19 (CCL19)                               | X                                | —                | turquoise          | —                     |
| CCL20                | CCL20     | 6364     | C-C motif chemokine 20 (CCL20)                               | X                                | —                | turquoise          | blue                  |
| CCL23                | CCL23     | 6368     | C-C motif chemokine 23 (CCL23)                               |                                  | turquoise        | turquoise          | —                     |
| CCL24                | CCL24     | 6369     | C-C motif chemokine 24 (CCL24)                               |                                  | —                | —                  | —                     |
| CCL25                | CCL25     | 6370     | C-C motif chemokine 25 (CCL25)                               |                                  | —                | turquoise          | blue                  |
| CCL28                | CCL28     | 56477    | C-C motif chemokine 28 (CCL28)                               |                                  | —                | —                  | green                 |
| CCL3                 | CCL3      | 6348     | C-C motif chemokine 3 (CCL3)                                 | X                                | brown            | turquoise          | —                     |
| CCL4                 | CCL4      | 6351     | C-C motif chemokine 4 (CCL4)                                 | X                                | —                | purple             | —                     |
| CD163                | CD163     | 9332     | Scavenger receptor cysteine-rich type 1 protein M130 (CD163) |                                  | yellow           | turquoise          | turquoise2            |

| Protein abbreviation | Gene name | Entez ID | Protein full name                                                  | Selected as inflammation-related | Assigned cluster |                    |                       |
|----------------------|-----------|----------|--------------------------------------------------------------------|----------------------------------|------------------|--------------------|-----------------------|
|                      |           |          |                                                                    |                                  | PROMIS HFpEF     | Northwestern HFpEF | Northwestern Controls |
| CD244                | CD244     | 51744    | Natural killer cell receptor 2B4 (CD244)                           |                                  | blue             | turquoise          | blue                  |
| CD4                  | CD4       | 920      | T-cell surface glycoprotein CD4 (CD4)                              | X                                | brown            | turquoise          | turquoise3            |
| CD40                 | CD40      | 958      | CD40L receptor (CD40)                                              | X                                | turquoise        | turquoise          | blue                  |
| CD40L                | CD40LG    | 959      | CD40 ligand (CD40-L)                                               | X                                | blue             | purple             | purple                |
| CD5                  | CD5       | 921      | T-cell surface glycoprotein CD5 (CD5)                              |                                  | turquoise        | turquoise          | turquoise             |
| CD6                  | CD6       | 923      | T cell surface glycoprotein CD6 isoform (CD6)                      |                                  | —                | turquoise          | turquoise             |
| CD84                 | CD84      | 8832     | SLAM family member 5 (CD84)                                        |                                  | brown            | purple             | purple                |
| CD8A                 | CD8A      | 925      | T-cell surface glycoprotein CD8-alpha (CD8A)                       | X                                | —                | n.a.               | n.a.                  |
| CD93                 | CD93      | 22918    | Complement component C1q receptor (CD93)                           |                                  | turquoise        | turquoise          | turquoise             |
| CDCP1                | CDCP1     | 64866    | CUB domain-containing protein 1 (CDCP1)                            |                                  | turquoise        | turquoise          | —                     |
| CDH5                 | CDH5      | 1003     | Cadherin-5 (CDH5)                                                  |                                  | yellow           | turquoise          | turquoise2            |
| CEACAM8              | CEACAM8   | 1088     | Carcinoembryonic antigenrelated cell adhesion molecule 8 (CEACAM8) |                                  | turquoise        | orange             | orange                |
| CHI3L1               | CHI3L1    | 1116     | Chitinase-3-like protein 1 (CHI3L1)                                |                                  | turquoise        | turquoise          | —                     |
| CHIT1                | CHIT1     | 1118     | Chitotriosidase-1 (CHIT1)                                          |                                  | —                | —                  | —                     |
| CNTN1                | CNTN1     | 1272     | Contactin-1 (CNTN1)                                                |                                  | yellow           | —                  | turquoise2            |



| Protein abbreviation | Gene name | Entez ID | Protein full name                              | Selected as inflammation-related | Assigned cluster |                    |                       |
|----------------------|-----------|----------|------------------------------------------------|----------------------------------|------------------|--------------------|-----------------------|
|                      |           |          |                                                |                                  | PROMIS HFpEF     | Northwestern HFpEF | Northwestern Controls |
| COL1A1               | COL1A1    | 1277     | Collagen I alpha-1 chain (COL1A1)              |                                  | —                | turquoise          | green                 |
| CPA1                 | CPA1      | 1357     | Carboxypeptidase A1 (CPA1)                     |                                  | —                | —                  | —                     |
| CPB1                 | CPB1      | 1360     | Carboxypeptidase B (CPB1)                      |                                  | —                | —                  | —                     |
| CSF1                 | CSF1      | 1435     | Macrophage colony-stimulating factor 1 (CSF-1) | X                                | turquoise        | turquoise          | turquoise             |
| CST5                 | CST5      | 1473     | Cystatin D (CST5)                              |                                  | —                | turquoise          | —                     |
| CSTB                 | CSTB      | 1476     | Cystatin-B (CSTB)                              |                                  | turquoise        | turquoise          | turquoise3            |
| CTRC                 | CTRC      | 11330    | Chymotrypsin C (CTRC)                          |                                  | —                | —                  | —                     |
| CTSD                 | CTSD      | 1509     | Cathepsin D (CTSD)                             |                                  | —                | turquoise          | turquoise             |
| CTSL1                | CTSL      | 1514     | Cathepsin L1 (CTSL1)                           |                                  | brown            | turquoise          | —                     |
| CTSZ                 | CTSZ      | 1522     | Cathepsin Z (CTSZ)                             |                                  | turquoise        | turquoise          | turquoise             |
| CX3CL1               | CX3CL1    | 6376     | Fractalkine (CX3CL1)                           |                                  | turquoise        | turquoise          | turquoise             |
| CXCL1                | CXCL1     | 2919     | C-X-C motif chemokine 1 (CXCL1)                | X                                | blue             | —                  | turquoise2            |
| CXCL10               | CXCL10    | 3627     | C-X-C motif chemokine 10 (CXCL10)              | X                                | —                | turquoise          | green                 |
| CXCL11               | CXCL11    | 6373     | C-X-C motif chemokine 11 (CXCL11)              |                                  | blue             | —                  | —                     |
| CXCL16               | CXCL16    | 58191    | C-X-C motif chemokine 16 (CXCL16)              |                                  | turquoise        | turquoise          | turquoise2            |
| CXCL5                | CXCL5     | 6374     | C-X-C motif chemokine 5 (CXCL5)                |                                  | blue             | purple             | turquoise2            |
| CXCL6                | CXCL6     | 6372     | C-X-C motif chemokine 6 (CXCL6)                |                                  | blue             | —                  | purple                |

| Protein abbreviation | Gene name | Entez ID | Protein full name                                                      | Selected as inflammation-related | Assigned cluster |                    |                       |
|----------------------|-----------|----------|------------------------------------------------------------------------|----------------------------------|------------------|--------------------|-----------------------|
|                      |           |          |                                                                        |                                  | PROMIS HFpEF     | Northwestern HFpEF | Northwestern Controls |
| CXCL9                | CXCL9     | 4283     | C-X-C motif chemokine 9 (CXCL9)                                        |                                  | —                | turquoise          | green                 |
| DCN                  | DCN       | 1634     | Decorin (DCN)                                                          |                                  | brown            | turquoise          | turquoise3            |
| DECR1                | DECR1     | 1666     | 2,4-dienoyl-CoA reductase, mitochondrial (DECR1)                       |                                  | blue             | blue               | blue                  |
| Dkk1                 | DKK1      | 22943    | Dickkopf-related protein 1 (Dkk-1)                                     |                                  | blue             | purple             | purple                |
| DLK1                 | DLK1      | 8788     | Protein delta homolog 1 (DLK-1)                                        |                                  | turquoise        | turquoise          | turquoise             |
| DNER                 | DNER      | 92737    | Delta and Notch-like epidermal growth factor-related receptor (DNER)   |                                  | —                | —                  | —                     |
| EGFR                 | EGFR      | 1956     | Epidermal growth factor receptor (EGFR)                                |                                  | turquoise        | —                  | —                     |
| EIF4EBP1             | EIF4EBP1  | 1978     | Eukaryotic translation initiation factor 4E-binding protein 1 (4E-BP1) |                                  | blue             | blue               | blue                  |
| ENRAGE               | S100A12   | 6283     | Protein S100-A12 (EN-RAGE)                                             |                                  | —                | orange             | orange                |
| EpCAM                | EPCAM     | 4072     | Epithelial cell adhesion molecule (Ep-CAM)                             |                                  | —                | —                  | —                     |
| EPHB4                | EPHB4     | 2050     | Ephrin type-B receptor 4 (EPHB4)                                       |                                  | turquoise        | turquoise          | turquoise             |
| FABP2                | FABP2     | 2169     | Fatty acid-binding protein, intestinal (FABP2)                         |                                  | —                | —                  | turquoise3            |
| FABP4                | FABP4     | 2167     | Fatty acid-binding protein, adipocyte (FABP4)                          |                                  | turquoise        | turquoise          | —                     |
| FABP6                | FABP6     | 2172     | Gastrotropin (GT)                                                      |                                  | —                | turquoise          | orange                |
| FAS                  | FAS       | 355      | Tumor necrosis factor receptor                                         |                                  | turquoise        | turquoise          | turquoise             |

| Protein abbreviation | Gene name | Entez ID | Protein full name                                  | Selected as inflammation-related | Assigned cluster |                    |                       |
|----------------------|-----------|----------|----------------------------------------------------|----------------------------------|------------------|--------------------|-----------------------|
|                      |           |          |                                                    |                                  | PROMIS HFpEF     | Northwestern HFpEF | Northwestern Controls |
|                      |           |          | superfamily member 6 (FAS)                         |                                  |                  |                    |                       |
| FGF19                | FGF19     | 9965     | Fibroblast growth factor 19 (FGF-19)               |                                  | —                | —                  | —                     |
| FGF21                | FGF21     | 26291    | Fibroblast growth factor 21 (FGF-21)               |                                  | —                | turquoise          | —                     |
| FGF23                | FGF23     | 8074     | Fibroblast growth factor 23 (FGF-23)               |                                  | turquoise        | turquoise          | blue                  |
| Flt3L                | FLT3LG    | 2323     | Fms-related tyrosine kinase 3 ligand (Flt3L)       |                                  | —                | —                  | green                 |
| FS                   | FST       | 10468    | Follistatin (FS)                                   |                                  | brown            | —                  | green                 |
| Gal3                 | LGALS3    | 3958     | Galectin-3 (Gal-3)                                 |                                  | turquoise        | turquoise          | turquoise3            |
| Gal4                 | LGALS4    | 3960     | Galectin-4 (Gal-4)                                 |                                  | —                | turquoise          | turquoise3            |
| Gal9                 | LGALS9    | 3965     | Galectin-9 (Gal-9)                                 |                                  | turquoise        | turquoise          | turquoise3            |
| GDF15                | GDF15     | 9518     | Growth/differentiation factor 15 (GDF-15)          |                                  | turquoise        | turquoise          | turquoise3            |
| GDF2                 | GDF2      | 2658     | Growth/differentiation factor 2 (GDF-2)            |                                  | —                | —                  | purple                |
| GDNF                 | GDNF      | 2668     | Glial cell line-derived neurotrophic factor (GDNF) |                                  | —                | —                  | green                 |
| GH                   | GH1       | 2688     | Growth hormone (GH)                                |                                  | —                | —                  | —                     |
| GIF                  | GIF       | 2694     | Gastric intrinsic factor (GIF)                     |                                  | —                | —                  | —                     |
| GLO1                 | GLO1      | 2739     | Lactoylglutathione lyase (GLO1)                    |                                  | blue             | —                  | orange                |
| GP6                  | GP6       | 51206    | platelet glycoprotein VI (GP6)                     |                                  | blue             | n.a.               | n.a.                  |
| GRN                  | GRN       | 2896     | Granulins (GRN)                                    |                                  | yellow           | turquoise          | turquoise2            |
| HAOX1                | HAO1      | 54363    | Hydroxyacid oxidase 1 (HAOX1)                      |                                  | —                | turquoise          | —                     |
| HBEGF                | HBEGF     | 1839     | Proheparin-binding EGF-like growth factor (HB-EGF) |                                  | blue             | purple             | purple                |

| Protein abbreviation | Gene name | Entez ID | Protein full name                                                                | Selected as inflammation-related | Assigned cluster |                    |                       |
|----------------------|-----------|----------|----------------------------------------------------------------------------------|----------------------------------|------------------|--------------------|-----------------------|
|                      |           |          |                                                                                  |                                  | PROMIS HFpEF     | Northwestern HFpEF | Northwestern Controls |
| HGF                  | HGF       | 3082     | Hepatocyte growth factor (HGF)                                                   | X                                | yellow           | —                  | green                 |
| HO1                  | HMOX1     | 3162     | Heme oxygenase 1 (HO-1)                                                          |                                  | brown            | turquoise          | —                     |
| hOSCAR               | OSCAR     | 126014   | Osteoclast-associated immunoglobulin-like receptor (hOSCAR)                      |                                  | brown            | turquoise          | turquoise3            |
| HSP27                | HSPB1     | 3315     | Heat shock 27 kDa protein (HSP 27)                                               |                                  | blue             | blue               | blue                  |
| ICAM2                | ICAM2     | 3384     | Intercellular adhesion molecule 2 (ICAM-2)                                       | X                                | —                | turquoise          | turquoise             |
| IDUA                 | IDUA      | 3425     | Alpha-L-iduronidase (IDUA)                                                       |                                  | —                | —                  | —                     |
| IGFBP1               | IGFBP1    | 3484     | Insulin-like growth factor-binding protein 1 (IGFBP-1)                           |                                  | —                | turquoise          | —                     |
| IGFBP2               | IGFBP2    | 3485     | Insulin-like growth factor-binding protein 2 (IGFBP-2)                           |                                  | —                | turquoise          | —                     |
| IGFBP7               | IGFBP7    | 3490     | Insulin-like growth factor-binding protein 7 (IGFBP-7)                           |                                  | yellow           | turquoise          | turquoise             |
| IgGFcR2B             | FCGR2B    | 2213     | Low affinity immunoglobulin gamma Fc region receptor II-b (IgG Fc receptor II-b) |                                  | —                | —                  | green                 |
| IL10                 | IL10      | 3586     | Interleukin-10 (IL-10)                                                           | X                                | —                | turquoise          | —                     |
| IL10RA               | IL10RA    | 3587     | Interleukin-10 receptor subunit alpha (IL-10RA)                                  |                                  | —                | —                  | —                     |
| IL10RB               | IL10RB    | 3588     | Interleukin-10 receptor subunit beta (IL-10RB)                                   | X                                | turquoise        | turquoise          | turquoise             |
| IL12B                | IL12B     | 3593     | Interleukin-12 subunit beta (IL-12B)                                             | X                                | turquoise        | turquoise          | green                 |

| Protein abbreviation | Gene name | Entez ID | Protein full name                                  | Selected as inflammation-related | Assigned cluster |                    |                       |
|----------------------|-----------|----------|----------------------------------------------------|----------------------------------|------------------|--------------------|-----------------------|
|                      |           |          |                                                    |                                  | PROMIS HFpEF     | Northwestern HFpEF | Northwestern Controls |
| IL15RA               | IL15RA    | 3601     | Interleukin-15 receptor subunit alpha (IL-15RA)    |                                  | —                | turquoise          | turquoise             |
| IL16                 | IL16      | 3603     | Pro-interleukin-16 (IL16)                          |                                  | brown            | orange             | orange                |
| IL17A                | IL17A     | 3605     | Interleukin-17A (IL-17A)                           | X                                | —                | —                  | —                     |
| IL17C                | IL17C     | 27189    | Interleukin-17C (IL-17C)                           | X                                | —                | turquoise          | —                     |
| IL17D                | IL17D     | 53342    | Interleukin-17D (IL-17D)                           |                                  | —                | —                  | green                 |
| IL17RA               | IL17RA    | 23765    | Interleukin-17 receptor A (IL-17RA)                | X                                | —                | turquoise          | —                     |
| IL18                 | IL18      | 3606     | Interleukin-18 (IL-18)                             | X                                | brown            | turquoise          | —                     |
| IL18BP               | IL18BP    | 10068    | Interleukin-18-binding protein (IL-18BP)           |                                  | turquoise        | turquoise          | turquoise             |
| IL18R1               | IL18R1    | 8809     | Interleukin-18 receptor 1 (IL-18R1)                | X                                | —                | turquoise          | —                     |
| IL1RA                | IL1RN     | 3557     | Interleukin-1 receptor antagonist protein (IL-1ra) |                                  | turquoise        | orange             | turquoise3            |
| IL1RL2               | IL1RL2    | 8808     | Interleukin-1 receptor-like 2 (IL1RL2)             |                                  | —                | —                  | —                     |
| IL1RT1               | IL1R1     | 3554     | Interleukin-1 receptor type 1 (IL-1RT1)            | X                                | yellow           | turquoise          | turquoise2            |
| IL1RT2               | IL1R2     | 7850     | Interleukin-1 receptor type 2 (IL-1RT2)            | X                                | —                | —                  | —                     |
| IL27                 | IL27      | 246778   | Interleukin-27 (IL-27)                             |                                  | brown            | turquoise          | —                     |
| IL2RA                | IL2RA     | 3559     | Interleukin-2 receptor subunit alpha (IL2-RA)      | X                                | turquoise        | turquoise          | turquoise             |
| IL4RA                | IL4R      | 3566     | Interleukin-4 receptor subunit alpha (IL-4RA)      | X                                | turquoise        | turquoise          | turquoise3            |
| IL6                  | IL6       | 3569     | Interleukin-6 (IL-6)                               | X                                | —                | —                  | —                     |

| Protein abbreviation | Gene name | Entez ID | Protein full name                                                             | Selected as inflammation-related | Assigned cluster |                    |                       |
|----------------------|-----------|----------|-------------------------------------------------------------------------------|----------------------------------|------------------|--------------------|-----------------------|
|                      |           |          |                                                                               |                                  | PROMIS HFpEF     | Northwestern HFpEF | Northwestern Controls |
| IL6RA                | IL6R      | 3570     | Interleukin-6 receptor subunit alpha (IL6-RA)                                 | X                                | —                | —                  | —                     |
| IL7                  | IL7       | 3574     | Interleukin-7 (IL-7)                                                          |                                  | blue             | purple             | purple                |
| IL8                  | CXCL8     | 3576     | Interleukin-8 (IL-8)                                                          | X                                | —                | turquoise          | purple                |
| ITGB1BP2             | ITGB1BP2  | 26548    | Melusin (ITGB1BP2)                                                            |                                  | blue             | blue               | blue                  |
| ITGB2                | ITGB2     | 3689     | Integrin beta-2 (ITGB2)                                                       | X                                | —                | —                  | turquoise2            |
| JAMA                 | F11R      | 50848    | Junctional adhesion molecule A (JAM-A)                                        |                                  | blue             | blue               | blue                  |
| KIM1                 | HAVCR1    | 26762    | Kidney injury molecule 1 (KIM-1)                                              |                                  | —                | turquoise          | turquoise3            |
| KLK6                 | KLK6      | 5653     | Kallikrein-6 (KLK6)                                                           |                                  | turquoise        | turquoise          | turquoise             |
| LAPTGFb1             | TGFB1     | 7040     | Latency-associated peptide transforming growth factor beta 1 (LAP TGF-beta-1) | X                                | blue             | purple             | purple                |
| LDLreceptor          | LDLR      | 3949     | Low-density lipoprotein receptor (LDL receptor)                               |                                  | —                | —                  | —                     |
| LEP                  | LEP       | 3952     | Leptin (LEP)                                                                  |                                  | —                | —                  | —                     |
| LIFR                 | LIFR      | 3977     | Leukemia inhibitory factor receptor (LIF-R)                                   |                                  | yellow           | turquoise          | turquoise2            |
| LOX1                 | OLR1      | 4973     | Lectin-like oxidized LDL receptor 1 (LOX-1)                                   |                                  | blue             | orange             | orange                |
| LPL                  | LPL       | 4023     | Lipoprotein lipase (LPL)                                                      |                                  | brown            | turquoise          | turquoise             |
| LTBR                 | LTBR      | 4055     | Lymphotoxin-beta receptor (LTBR)                                              | X                                | turquoise        | turquoise          | turquoise             |
| MARCO                | MARCO     | 8685     | Macrophage receptor MARCO (MARCO)                                             |                                  | brown            | turquoise          | —                     |
| MB                   | MB        | 4151     | Myoglobin (MB)                                                                |                                  | turquoise        | turquoise          | —                     |
| MCP1                 | CCL2      | 6347     | Monocyte chemotactic protein 1 (MCP-1)                                        | X                                | —                | purple             | purple                |

| Protein abbreviation | Gene name | Entez ID | Protein full name                               | Selected as inflammation-related | Assigned cluster |                    |                       |
|----------------------|-----------|----------|-------------------------------------------------|----------------------------------|------------------|--------------------|-----------------------|
|                      |           |          |                                                 |                                  | PROMIS HFpEF     | Northwestern HFpEF | Northwestern Controls |
| MCP2                 | CCL8      | 6355     | Monocyte chemotactic protein 2 (MCP-2)          |                                  | —                | purple             | purple                |
| MCP3                 | CCL7      | 6354     | Monocyte chemotactic protein 3 (MCP-3)          |                                  | —                | orange             | —                     |
| MCP4                 | CCL13     | 6357     | Monocyte chemotactic protein 4 (MCP-4)          |                                  | blue             | purple             | —                     |
| MEPE                 | MEPE      | 56955    | Matrix extracellular phosphoglycoprotein (MEPE) |                                  | turquoise        | turquoise          | turquoise             |
| MERTK                | MERTK     | 10461    | Tyrosine-protein kinase Mer (MERTK)             |                                  | brown            | turquoise          | purple                |
| MMP1                 | MMP1      | 4312     | Matrix metalloproteinase-1 (MMP-1)              |                                  | blue             | —                  | purple                |
| MMP10                | MMP10     | 4319     | Matrix metalloproteinase-10 (MMP-10)            |                                  | —                | turquoise          | turquoise3            |
| MMP12                | MMP12     | 4321     | Matrix metalloproteinase-12 (MMP-12)            |                                  | brown            | —                  | turquoise3            |
| MMP2                 | MMP2      | 4313     | Matrix metalloproteinase-2 (MMP-2)              |                                  | yellow           | turquoise          | turquoise2            |
| MMP3                 | MMP3      | 4314     | Matrix metalloproteinase-3 (MMP-3)              | X                                | —                | turquoise          | —                     |
| MMP7                 | MMP7      | 4316     | Matrix metalloproteinase-7 (MMP-7)              |                                  | brown            | blue               | blue                  |
| MMP9                 | MMP9      | 4318     | Matrix metalloproteinase-9 (MMP-9)              | X                                | blue             | orange             | orange                |
| MPO                  | MPO       | 4353     | Myeloperoxidase (MPO)                           |                                  | —                | orange             | orange                |
| NEMO                 | IKBKG     | 8517     | NF-kappa-B essential modulator (NEMO)           | X                                | blue             | blue               | blue                  |

| Protein abbreviation | Gene name | Entez ID | Protein full name                                            | Selected as inflammation-related | Assigned cluster |                    |                       |
|----------------------|-----------|----------|--------------------------------------------------------------|----------------------------------|------------------|--------------------|-----------------------|
|                      |           |          |                                                              |                                  | PROMIS HFpEF     | Northwestern HFpEF | Northwestern Controls |
| Notch3               | NOTCH3    | 4854     | Neurogenic locus notch homolog protein 3 (Notch 3)           |                                  | yellow           | turquoise          | turquoise2            |
| NT3                  | NTF3      | 4908     | Neurotrophin-3 (NT-3)                                        |                                  | —                | —                  | blue                  |
| NTproBNP             | NPPB      | 4879     | N-terminal prohormone brain natriuretic peptide (NT-pro BNP) |                                  | —                | turquoise          | —                     |
| OPG                  | TNFRSF11B | 4982     | Osteoprotegerin (OPG)                                        |                                  | yellow           | turquoise          | blue                  |
| OPN                  | SPP1      | 6696     | Osteopontin (OPN)                                            |                                  | turquoise        | turquoise          | —                     |
| OSM                  | OSM       | 5008     | Oncostatin-M (OSM)                                           | X                                | blue             | orange             | orange                |
| PAI                  | SERPINE1  | 5054     | Plasminogen activator inhibitor 1 (PAI)                      |                                  | blue             | purple             | purple                |
| PAPPA                | PAPPA     | 5069     | Pappalysin-1 (PAPPA)                                         |                                  | —                | —                  | green                 |
| PAR1                 | F2R       | 2149     | Proteinase-activated receptor 1 (PAR-1)                      |                                  | brown            | blue               | blue                  |
| PARP1                | PARP1     | 142      | Poly [ADP-ribose] polymerase 1 (PARP-1)                      |                                  | —                | blue               | blue                  |
| PCSK9                | PCSK9     | 255738   | Proprotein convertase subtilisin/kexin type 9 (PCSK9)        |                                  | —                | turquoise          | turquoise             |
| PDGFA                | PDGFA     | 5154     | Platelet-derived growth factor subunit A (PDGF subunit A)    |                                  | blue             | purple             | purple                |
| PDGFB                | PDGFB     | 5155     | Platelet-derived growth factor subunit B (PDGF subunit B)    |                                  | blue             | purple             | purple                |
| PDL1                 | CD274     | 29126    | Programmed cell death 1 ligand 1 (PDL1)                      | X                                | turquoise        | turquoise          | turquoise             |
| PDL2                 | PDCD1LG2  | 80380    | Programmed cell death 1 ligand 2 (PDL2)                      |                                  | brown            | turquoise          | purple                |



| Protein abbreviation | Gene name | Entez ID | Protein full name                                       | Selected as inflammation-related | Assigned cluster |                    |                       |
|----------------------|-----------|----------|---------------------------------------------------------|----------------------------------|------------------|--------------------|-----------------------|
|                      |           |          |                                                         |                                  | PROMIS HFpEF     | Northwestern HFpEF | Northwestern Controls |
| PECAM1               | PECAM1    | 5175     | Platelet endothelial cell adhesion molecule (PECAM-1)   |                                  | blue             | blue               | blue                  |
| PGLYRP1              | PGLYRP1   | 8993     | Peptidoglycan recognition protein 1 (PGLYRP1)           |                                  | turquoise        | orange             | orange                |
| PI3                  | PI3       | 5266     | Elafin (PI3)                                            |                                  | turquoise        | turquoise          | —                     |
| PIgR                 | PIGR      | 5284     | Polymeric immunoglobulin receptor (PIgR)                |                                  | brown            | blue               | purple                |
| PLC                  | HSPG2     | 3339     | Perlecan (PLC)                                          |                                  | turquoise        | turquoise          | turquoise             |
| PLGF                 | PGF       | 5228     | Placenta growth factor (PIGF)                           |                                  | brown            | turquoise          | turquoise3            |
| PON3                 | PON3      | 5446     | Paraoxonase (PON3)                                      |                                  | —                | —                  | —                     |
| PRELP                | PRELP     | 5549     | Prolargin (PRELP)                                       |                                  | brown            | turquoise          | turquoise3            |
| PRSS27               | PRSS27    | 83886    | Serine protease 27 (PRSS27)                             |                                  | brown            | —                  | purple                |
| PRSS8                | PRSS8     | 5652     | Prostasin (PRSS8)                                       |                                  | brown            | turquoise          | turquoise3            |
| PRTN3                | PRTN3     | 5657     | Myeloblastin (PRTN3)                                    |                                  | turquoise        | orange             | orange                |
| PSGL1                | SELPLG    | 6404     | P-selectin glycoprotein ligand 1 (PSGL-1)               |                                  | —                | —                  | —                     |
| PSPD                 | SFTPD     | 6441     | Pulmonary surfactant-associated protein D (PSP-D)       |                                  | —                | —                  | —                     |
| PTX3                 | PTX3      | 5806     | Pentraxin-related protein PTX3 (PTX3)                   |                                  | —                | orange             | —                     |
| RAGE                 | AGER      | 177      | Receptor for advanced glycosylation end products (RAGE) |                                  | brown            | turquoise          | green                 |
| RARRES2              | RARRES2   | 5919     | Retinoic acid receptor responder protein 2 (RARRES2)    |                                  | turquoise        | —                  | —                     |
| REN                  | REN       | 5972     | Renin (REN)                                             |                                  | brown            | —                  | —                     |
| RETN                 | RETN      | 56729    | Resistin (RETN)                                         |                                  | turquoise        | orange             | turquoise             |

| Protein abbreviation | Gene name | Entez ID | Protein full name                                                   | Selected as inflammation-related | Assigned cluster |                    |                       |
|----------------------|-----------|----------|---------------------------------------------------------------------|----------------------------------|------------------|--------------------|-----------------------|
|                      |           |          |                                                                     |                                  | PROMIS HFpEF     | Northwestern HFpEF | Northwestern Controls |
| SCF                  | KITLG     | 4254     | Stem cell factor (SCF)                                              |                                  | brown            | —                  | —                     |
| SCGB3A2              | SCGB3A2   | 117156   | Secretoglobin family 3A member 2 (SCGB3A2)                          |                                  | —                | —                  | green                 |
| SELE                 | SELE      | 6401     | E-selectin (SELE)                                                   |                                  | —                | —                  | turquoise             |
| SELP                 | SELP      | 6403     | P-selectin (SELP)                                                   |                                  | blue             | blue               | blue                  |
| SERPINA12            | SERPINA12 | 145264   | Serpin A12 (SERPINA12)                                              |                                  | —                | —                  | —                     |
| SHPS1                | SIRPA     | 140885   | Tyrosine-protein phosphatase non-receptor type substrate 1 (SHPS-1) |                                  | turquoise        | turquoise          | turquoise             |
| SIRT2                | SIRT2     | 22933    | SIR2-like protein 2 (SIRT2)                                         |                                  | blue             | blue               | blue                  |
| SLAMF1               | SLAMF1    | 6504     | Signaling lymphocytic activation molecule (SLAMF1)                  |                                  | —                | turquoise          | —                     |
| SLAMF7               | SLAMF7    | 57823    | SLAM family member 7 (SLAMF7)                                       |                                  | —                | turquoise          | green                 |
| SOD2                 | SOD2      | 6648     | Superoxide dismutase [Mn], mitochondrial (SOD2)                     |                                  | brown            | —                  | blue                  |
| SORT1                | SORT1     | 6272     | Sortilin (SORT1)                                                    |                                  | brown            | purple             | purple                |
| SPON1                | SPON1     | 10418    | Spondin-1 (SPON1)                                                   |                                  | yellow           | —                  | green                 |
| SPON2                | SPON2     | 10417    | Spondin-2 (SPON2)                                                   |                                  | brown            | blue               | turquoise3            |
| SRC                  | SRC       | 6714     | Proto-oncogene tyrosine-protein kinase Src (SRC)                    | X                                | blue             | blue               | blue                  |
| ST1A1                | SULT1A1   | 6817     | Sulfotransferase 1A1 (ST1A1)                                        |                                  | blue             | blue               | blue                  |
| ST2                  | IL1RL1    | 9173     | ST2 protein (ST2)                                                   |                                  | —                | turquoise          | —                     |
| STAMPB               | STAMPB    | 10617    | STAM-binding protein (STAMPB)                                       |                                  | blue             | blue               | blue                  |
| STK4                 | STK4      | 6789     | Serine/threonine-protein kinase 4 (STK4)                            |                                  | blue             | blue               | blue                  |

| Protein abbreviation | Gene name | Entez ID | Protein full name                                                 | Selected as inflammation-related | Assigned cluster |                    |                       |
|----------------------|-----------|----------|-------------------------------------------------------------------|----------------------------------|------------------|--------------------|-----------------------|
|                      |           |          |                                                                   |                                  | PROMIS HFpEF     | Northwestern HFpEF | Northwestern Controls |
| TF                   | F3        | 2152     | Tissue factor (TF)                                                |                                  | brown            | turquoise          | purple                |
| TFF3                 | TFF3      | 7033     | Trefoil factor 3 (TFF3)                                           |                                  | turquoise        | turquoise          | turquoise3            |
| TFPI                 | TFPI      | 7035     | Tissue factor pathway inhibitor (TFPI)                            |                                  | —                | —                  | green                 |
| TGFa                 | TGFA      | 7039     | Transforming growth factor alpha (TGF-alpha)                      |                                  | turquoise        | orange             | orange                |
| TGM2                 | TGM2      | 7052     | Protein-glutamine gamma-glutamyltransferase 2 (TGM2)              |                                  | blue             | blue               | blue                  |
| THBS2                | THBS2     | 7058     | Thrombospondin-2 (THBS2)                                          |                                  | —                | —                  | —                     |
| THPO                 | THPO      | 7066     | Thrombopoietin (THPO)                                             |                                  | blue             | purple             | purple                |
| TIE2                 | TEK       | 7010     | Angiopoietin-1 receptor (TIE2)                                    |                                  | brown            | turquoise          | purple                |
| TIMP4                | TIMP4     | 7079     | Metalloproteinase inhibitor 4 (TIMP4)                             |                                  | —                | turquoise          | —                     |
| TLT2                 | TREML2    | 79865    | Trem-like transcript 2 protein (TLT-2)                            |                                  | turquoise        | turquoise          | turquoise             |
| TM                   | THBD      | 7056     | Thrombomodulin (TM)                                               |                                  | brown            | turquoise          | purple                |
| TNFB                 | LTA       | 4049     | TNF-beta (TNFB)                                                   | X                                | —                | turquoise          | blue                  |
| TNFR1                | TNFRSF1A  | 7132     | Tumor necrosis factor receptor 1 (TNF-R1)                         | X                                | turquoise        | turquoise          | turquoise             |
| TNFR2                | TNFRSF1B  | 7133     | Tumor necrosis factor receptor 2 (TNF-R2)                         | X                                | turquoise        | turquoise          | turquoise             |
| TNFRSF10A            | TNFRSF10A | 8797     | Tumor necrosis factor receptor superfamily member 10A (TNFRSF10A) |                                  | brown            | turquoise          | turquoise3            |
| TNFRSF10C            | TNFRSF10C | 8794     | Tumor necrosis factor receptor                                    |                                  | turquoise        | orange             | turquoise             |

| Protein abbreviation | Gene name | Entez ID | Protein full name                                                 | Selected as inflammation-related | Assigned cluster |                    |                       |
|----------------------|-----------|----------|-------------------------------------------------------------------|----------------------------------|------------------|--------------------|-----------------------|
|                      |           |          |                                                                   |                                  | PROMIS HFpEF     | Northwestern HFpEF | Northwestern Controls |
|                      |           |          | superfamily member 10C (TNFRSF10C)                                |                                  |                  |                    |                       |
| TNFRSF11A            | TNFRSF11A | 8792     | Tumor necrosis factor receptor superfamily member 11A (TNFRSF11A) | X                                | brown            | turquoise          | turquoise3            |
| TNFRSF13B            | TNFRSF13B | 23495    | Tumor necrosis factor receptor superfamily member 13B (TNFRSF13B) |                                  | brown            | turquoise          | —                     |
| TNFRSF14             | TNFRSF14  | 8764     | Tumor necrosis factor receptor superfamily member 14 (TNFRSF14)   | X                                | turquoise        | turquoise          | turquoise             |
| TNFRSF9              | TNFRSF9   | 3604     | Tumor necrosis factor receptor superfamily member 9 (TNFRSF9)     |                                  | turquoise        | turquoise          | turquoise             |
| TNFSF13B             | TNFSF13B  | 10673    | Tumor necrosis factor ligand superfamily member 13B (TNFSF13B)    | X                                | —                | turquoise          | turquoise             |
| TNFSF14              | TNFSF14   | 8740     | Tumor necrosis factor ligand superfamily member 14 (TNFSF14)      |                                  | blue             | orange             | orange                |
| tPA                  | PLAT      | 5327     | Tissue-type plasminogen activator (t-PA)                          |                                  | blue             | —                  | —                     |
| TR                   | TFRC      | 7037     | Transferrin receptor protein 1 (TR)                               |                                  | —                | turquoise          | turquoise2            |
| TRAIL                | TNFSF10   | 8743     | TNF-related apoptosis-inducing ligand (TRAIL)                     |                                  | —                | —                  | blue                  |
| TRAILR2              | TNFRSF10B | 8795     | TNF-related apoptosis-inducing ligand receptor 2 (TRAIL-R2)       |                                  | brown            | turquoise          | turquoise3            |

| Protein abbreviation | Gene name | Entez ID | Protein full name                                             | Selected as inflammation-related | Assigned cluster |                    |                       |
|----------------------|-----------|----------|---------------------------------------------------------------|----------------------------------|------------------|--------------------|-----------------------|
|                      |           |          |                                                               |                                  | PROMIS HFpEF     | Northwestern HFpEF | Northwestern Controls |
| TRANCE               | TNFSF11   | 8600     | TNF-related activation-induced cytokine (TRANCE)              | X                                | —                | —                  | —                     |
| TRAP                 | ACP5      | 54       | Tartrate-resistant acid phosphatase type 5 (TR-AP)            |                                  | —                | —                  | turquoise             |
| TWEAK                | TNFSF12   | 8742     | Tumor necrosis factor (Ligand) superfamily, member 12 (TWEAK) |                                  | —                | —                  | green                 |
| uPA                  | PLAU      | 5328     | Urokinase-type plasminogen activator (uPA)                    |                                  | —                | turquoise          | blue                  |
| UPAR                 | PLAUR     | 5329     | Urokinase plasminogen activator surface receptor (U-PAR)      |                                  | turquoise        | turquoise          | turquoise             |
| VEGFA                | VEGFA     | 7422     | Vascular endothelial growth factor A (VEGF-A)                 |                                  | turquoise        | turquoise          | purple                |
| VEGFD                | FIGF      | 2277     | Vascular endothelial growth factor D (VEGF-D)                 |                                  | —                | turquoise          | green                 |
| VSIG2                | VSIG2     | 23584    | V-set and immunoglobulin domain-containing protein 2 (VSIG2)  |                                  | —                | turquoise          | turquoise3            |
| vWF                  | VWF       | 7450     | von Willebrand factor (vWF)                                   |                                  | blue             | turquoise          | —                     |
| XCL1                 | XCL1      | 6375     | Lymphotactin (XCL1)                                           |                                  | brown            | turquoise          | —                     |
| ARTN                 | ARTN      | 9048     | Artemin (ARTN)                                                |                                  |                  |                    |                       |
| FGF5                 | FGF5      | 2250     | Fibroblast growth factor 5 (FGF-5)                            |                                  |                  |                    |                       |
| IFNg                 | IFNG      | 3458     | Interferon gamma (IFN-gamma)                                  | X                                |                  |                    |                       |
| IL13                 | IL13      | 3596     | Interleukin-13 (IL-13)                                        | X                                |                  |                    |                       |
| IL1a                 | IL1A      | 3552     | Interleukin-1 alpha (IL-1 alpha)                              | X                                |                  |                    |                       |

| Protein abbreviation | Gene name | Entez ID | Protein full name                                   | Selected as inflammation-related | Assigned cluster |                    |                       |
|----------------------|-----------|----------|-----------------------------------------------------|----------------------------------|------------------|--------------------|-----------------------|
|                      |           |          |                                                     |                                  | PROMIS HFpEF     | Northwestern HFpEF | Northwestern Controls |
| IL2                  | IL2       | 3558     | Interleukin-2 (IL-2)                                | X                                |                  |                    |                       |
| IL20                 | IL20      | 50604    | Interleukin-20 (IL-20)                              | X                                |                  |                    |                       |
| IL20RA               | IL20RA    | 53832    | Interleukin-20 receptor subunit alpha (IL-20RA)     |                                  |                  |                    |                       |
| IL22RA1              | IL22RA1   | 58985    | Interleukin-22 receptor subunit alpha-1 (IL-22 RA1) |                                  |                  |                    |                       |
| IL24                 | IL24      | 11009    | Interleukin-24 (IL-24)                              |                                  |                  |                    |                       |
| IL2RB                | IL2RB     | 3560     | Interleukin-2 receptor subunit beta (IL-2RB)        |                                  |                  |                    |                       |
| IL33                 | IL33      | 90865    | Interleukin-33 (IL-33)                              |                                  |                  |                    |                       |
| IL4                  | IL4       | 3565     | Interleukin-4 (IL-4)                                | X                                |                  |                    |                       |
| IL5                  | IL5       | 3567     | Interleukin-5 (IL-5)                                | X                                |                  |                    |                       |
| LIF                  | LIF       | 3976     | Leukemia inhibitory factor (LIF)                    |                                  |                  |                    |                       |
| NRTN                 | NRTN      | 4902     | Neurturin (NRTN)                                    |                                  |                  |                    |                       |
| TNF                  | TNF       | 7124     | Tumor necrosis factor (TNF)                         | X                                |                  |                    |                       |
| TSLP                 | TSLP      | 85480    | Thymic stromal lymphopoietin (TSLP)                 | X                                |                  |                    |                       |

**Supplementary Table II: Search strategy and selected inflammatory pathways from GO, KEGG, and Reactome databases**

| Search term                             | Pathway description         | Manually included pathways                                                                                                                                                                   | Manually excluded pathways                                                                                                      |
|-----------------------------------------|-----------------------------|----------------------------------------------------------------------------------------------------------------------------------------------------------------------------------------------|---------------------------------------------------------------------------------------------------------------------------------|
| GO > inflamm                            | GO Inflammation             | Positive regulation, activation, production, response, regulation (neutral) of inflammation                                                                                                  | Connective tissue                                                                                                               |
| GO > immune                             | GO Immune response          | >100 terms, all included                                                                                                                                                                     | none                                                                                                                            |
| Reactome > immune                       | Reactome Immune system      | Adaptive immune system, innate immune system, immune system                                                                                                                                  | cytokine signaling, immune disease, RUNX3 regulates immune response and cell migration, SUMOylation of immune response proteins |
| Reactome > immune                       | Reactome Cytokine signaling | Cytokine signaling (1280215)                                                                                                                                                                 | all others                                                                                                                      |
| Reactome > inflamm                      | Not included                |                                                                                                                                                                                              | Resulted in only 1 specific pathway: CLe7a inflammasome                                                                         |
| Reactome > leuko                        | No output                   |                                                                                                                                                                                              |                                                                                                                                 |
| reactome > inflammation OR inflammatory | No output                   |                                                                                                                                                                                              |                                                                                                                                 |
| KEGG > immune                           | KEGG Immune system          | Th1, Th2 and TH17 differentiation, IL17 signaling, Toll-signaling, natural killer cytotoxicity, cell-adhesion molecules, NOD-signaling, chemokine signaling, leukocyte-endothelial migration | All others                                                                                                                      |
| KEGG > inflammatory                     | KEGG Cytokine signaling     | Cytokine-cytokine receptor interaction (04060)                                                                                                                                               |                                                                                                                                 |

|                                   |                                                             |  |                                                                           |
|-----------------------------------|-------------------------------------------------------------|--|---------------------------------------------------------------------------|
| KEGG > leuko                      | Not included                                                |  | Resulted in only 1 specific pathway: leukocyte transendothelial migration |
| KEGG > inflamm                    | Not included                                                |  | Inflammatory bowel disease, inflammatory mediation of TRP channels        |
| KEGG > immun                      | Not included                                                |  | Immunodeficiency, intestinal immune network                               |
| <b>COMBINATIONS</b>               |                                                             |  |                                                                           |
| GO score                          | GO Immune response or Inflammation                          |  |                                                                           |
| KEGG score                        | KEGG Immune system or Cytokine signaling                    |  |                                                                           |
| Reactome score                    | Reactome Immune system or Cytokine signaling                |  |                                                                           |
| Total Immune / Inflammation score | 1 point for each database (Immune or Inflammation/Cytokine) |  |                                                                           |
| Double annotation                 | 2 or more points on the total score                         |  |                                                                           |
| Triple annotation                 | 3 points on the total score                                 |  |                                                                           |

GO = Gene Ontology, the primary data source for enrichment analysis, using the ontology branch "Biological Process" (BP), <http://geneontology.org>; KEGG = Kyoto Encyclopedia of Genes and Genomes, similar and complementary to GO, also contains some compound data, <http://www.genome.jp/kegg>; Reactome, a curated and peer reviewed pathway database used for enrichment analysis, <http://www.reactome.org>



**Supplemental Table III. Top 10 Inflammatory Proteins in the Major Principal Components in PROMIS-HFpEF**

| PC1         | Corr. coeff. | PC2      | Corr. coeff. | PC3   | Corr. coeff. | PC4      | Corr. coeff. | PC5      | Corr. coeff. | PC6       | Corr. coeff. |
|-------------|--------------|----------|--------------|-------|--------------|----------|--------------|----------|--------------|-----------|--------------|
| TNFR1*†     | 0.91         | CD40L    | 0.94         | MMP9  | 0.92         | TNFB     | 0.66         | IL6      | 0.55         | IL1RT1*†  | 0.75         |
| LTBR*†      | 0.87         | NEMO     | 0.93         | OSM   | 0.87         | CCL19    | 0.63         | IL4RA    | 0.36         | ICAM2†    | 0.61         |
| TNFRSF14*†  | 0.83         | SRC      | 0.84         | MCP1  | 0.50         | IL12B    | 0.60         | CCL20    | 0.31         | IL1RT2†   | 0.54         |
| TNFRSF11A*† | 0.82         | CXCL1    | 0.76         | CASP8 | 0.38         | TRANCE   | 0.59         | HGF      | 0.30         | HGF*†     | 0.53         |
| TNFR2†      | 0.77         | CASP8    | 0.61         | CCL11 | 0.35         | CXCL10   | 0.37         | CSF1     | 0.26         | TNFSF13B† | 0.50         |
| PDL1†       | 0.74         | CD40     | 0.46         | HGF   | 0.35         | TNFSF13B | 0.34         | IL10     | 0.22         | LAPTGFb1  | 0.48         |
| IL10RB*†    | 0.73         | LAPTGFb1 | 0.42         | CCL4  | 0.33         | CCL3     | 0.33         | CXCL10   | 0.20         | IL18R1†   | 0.39         |
| IL2RA       | 0.71         | CCL3     | 0.32         | IL10  | 0.31         | CCL4     | 0.31         | LAPTGFb1 | 0.19         | IL17RA    | 0.35         |
| MMP3        | 0.60         | IL18     | 0.26         | IL8   | 0.31         | CD8A     | 0.31         | CD8A     | 0.18         | CSF1      | 0.34         |
| CD4†        | 0.55         | IL17RA   | 0.25         | MMP3  | 0.30         | CD4      | 0.31         | CD40     | 0.17         | ITGB2     | 0.27         |

Corr. coeff. = correlation coefficients between the proteins and the respective principal components (represents the variance in the protein explained by the principal component).

\*Biomarkers of PC1 and PC6 overlapping with the top 10 proteins of the turquoise and yellow cluster, respectively

†Biomarkers of PC1 and PC6 overlapping with the top 10 proteins of PC1 and PC5 in the Northwestern-HFpEF validation cohort, respectively.

Abbreviations: PC = principal component. For abbreviations of biomarkers, see Supplementary Table 1.

**Supplementary Table IV. Association between comorbidity burden and cardiac structure/function in PROMIS-HFpEF**

| Echocardiographic parameter (dependent variable) | N   | Model 1                       |         | Model 2                       |         |
|--------------------------------------------------|-----|-------------------------------|---------|-------------------------------|---------|
|                                                  |     | $\beta$ -coefficient (95% CI) | P-value | $\beta$ -coefficient (95% CI) | P-value |
| LV mass index                                    | 226 | 0.12<br>(-0.01 to 0.25)       | 0.07    | 0.059<br>(-0.068 to 0.19)     | 0.37    |
| Relative wall thickness                          | 226 | 0.16<br>(0.04 to 0.28)        | 0.01    | 0.13<br>(0.0014 to 0.26)      | 0.049‡  |
| Mitral E velocity                                | 226 | 0.18<br>(0.05 to 0.31)        | 0.006   | 0.21<br>(0.076 to 0.35)       | 0.002†  |
| e' velocity                                      | 222 | -0.0068<br>(-0.14 to 0.12)    | 0.91    | -0.14<br>(-0.25 to -0.02)     | 0.02*†  |
| E/e' ratio                                       | 222 | 0.082<br>(-0.05 to 0.21)      | 0.23    | 0.16<br>(0.02 to 0.29)        | 0.02*†  |
| LA reservoir strain                              | 221 | -0.23<br>(-0.34 to -0.12)     | <0.001  | -0.1<br>(-0.20 to -0.002)     | 0.047‡  |
| LA volume                                        | 221 | 0.22<br>(0.10 to 0.34)        | <0.001  | 0.13<br>(0.01 to 0.25)        | 0.03*†  |
| LA volume index                                  | 225 | 0.069<br>(-0.05 to 0.19)      | 0.26    | 0.02<br>(-0.10 to 0.15)       | 0.74*   |
| LV global longitudinal strain                    | 212 | -0.21<br>(-0.34 to -0.080)    | 0.002   | -0.17<br>(-0.30 to 0.039)     | 0.01†   |
| RV free wall strain                              | 221 | -0.30<br>(-0.42 to -0.17)     | <0.001  | -0.31<br>(-0.44 to -0.18)     | <0.001† |
| TAPSE                                            | 223 | 0.25<br>(0.12 to 0.38)        | <0.001  | 0.19<br>(0.063 to 0.32)       | 0.004†  |
| RV S' velocity                                   | 225 | -0.25<br>(-0.33 to -0.09)     | <0.001  | -0.26<br>(-0.38 to -0.13)     | <0.001† |
| TR velocity                                      | 190 | 0.16<br>(0.017 to 0.30)       | 0.03    | 0.15<br>(0.0027 to 0.30)      | 0.048‡  |

All  $\beta$ -coefficients were standardized. Model 1 adjusted for study site. Model 2 adjusted for study site, age, sex, and glomerular filtration rate.

\*Additionally adjusted for atrial fibrillation at the time of echocardiography.

†P<0.05 after correction for false discovery rate.

‡P<0.10 after correction for false discovery rate.

CI = confidence interval; LV = left ventricular; LA = left atrial; RV = right ventricular; TAPSE = tricuspid annular plane systolic excursion; TR= tricuspid regurgitation.

**Supplementary Table V. Association between comorbidity burden and inflammation principal components/clusters in PROMIS-HFpEF**

| Inflammation protein PC/cluster | Model 1                       |         | Model 2                       |         | Model 3                       |         |
|---------------------------------|-------------------------------|---------|-------------------------------|---------|-------------------------------|---------|
|                                 | $\beta$ -coefficient (95% CI) | P-value | $\beta$ -coefficient (95% CI) | P-value | $\beta$ -coefficient (95% CI) | P-value |
| PC1                             | 0.28<br>(0.15 to 0.41)        | <0.001* | 0.18<br>(0.08 to 0.28)        | <0.001* | 0.18<br>(0.08 to 0.29)        | <0.001* |
| PC2                             | 0.04<br>(-0.08 to 0.16)       | 0.53    | 0.04<br>(-0.08 to 0.17)       | 0.51    | 0.05<br>(-0.08 to 0.29)       | 0.47    |
| PC3                             | 0.16<br>(0.03 to 0.29)        | 0.02*   | 0.14<br>(0.01 to 0.26)        | 0.03*   | 0.13<br>(0.003 to 0.27)       | 0.046†  |
| PC4                             | -0.02<br>(-0.15 to 0.10)      | 0.71    | -0.01<br>(-0.14 to 0.12)      | 0.88    | -0.02<br>(-0.15 to 0.11)      | 0.80    |
| PC5                             | 0.19<br>(0.06 to 0.32)        | 0.004*  | 0.17<br>(0.04 to 0.31)        | 0.01*   | 0.17<br>(0.03 to 0.30)        | 0.01*   |
| PC6                             | 0.22<br>(0.09 to 0.34)        | 0.001*  | 0.22<br>(0.09 to 0.35)        | 0.001*  | 0.21<br>(0.08 to 0.34)        | 0.002*  |
| Turquoise                       | 0.31<br>(0.18 to 0.43)        | <0.001* | 0.21<br>(0.12 to 0.31)        | <0.001* | 0.21<br>(0.11 to 0.31)        | <0.001* |
| Yellow                          | 0.22<br>(0.10 to 0.35)        | <0.001* | 0.20<br>(0.08 to 0.32)        | 0.001*  | 0.19<br>(0.07 to 0.31)        | 0.002*  |
| Red                             | 0.09<br>(-0.04 to 0.22)       | 0.18    | 0.03<br>(-0.10 to 0.15)       | 0.64    | 0.04<br>(-0.09 to 0.16)       | 0.59    |

All  $\beta$ -coefficients were standardized. Model 1 adjusted for study site. Model 2 adjusted for study site, age, sex, and glomerular filtration rate. Model 3 adjusted for study site, age, sex, and glomerular filtration rate, and history of autoimmune disease or malignancy.

\*P<0.05 after correction for false discovery rate.

†P<0.10 after correction for false discovery rate.

Abbreviations: PC = principal component.

**Supplementary Table VI. Association between inflammation principal components/clusters and cardiac structure/function in PROMIS-HFpEF**

| Echo parameter | Principal Components |                    |               |             |               |                    |               |               |               |                    | Protein Clusters |                    |               |                    |               |               |
|----------------|----------------------|--------------------|---------------|-------------|---------------|--------------------|---------------|---------------|---------------|--------------------|------------------|--------------------|---------------|--------------------|---------------|---------------|
|                | PC1                  |                    | PC3           |             | PC4           |                    | PC5           |               | PC6           |                    | Turquoise        |                    | Yellow        |                    | Red           |               |
|                | $\beta$ -coef        | P                  | $\beta$ -coef | P           | $\beta$ -coef | P                  | $\beta$ -coef | P             | $\beta$ -coef | P                  | $\beta$ -coef    | P                  | $\beta$ -coef | P                  | $\beta$ -coef | P             |
| LVMI           | -0.007               | 0.93               | -0.072        | 0.26        | -0.077        | 0.24               | 0.11          | 0.09          | -0.018        | 0.78               | -0.054           | 0.52               | -0.025        | 0.72               | 0.0043        | 0.95          |
| RWT            | <b>-0.18</b>         | <b>0.03</b>        | 0.0054        | 0.93        | -0.12         | 0.06               | 0.043         | 0.50          | -0.016        | 0.81               | -0.2             | <b>0.02</b>        | -0.018        | 0.80               | -0.085        | 0.21          |
| mitral E       | <b>0.35</b>          | <b>&lt;0.001**</b> | -0.016        | 0.82        | <b>0.31</b>   | <b>&lt;0.001**</b> | <b>0.14</b>   | <b>0.04*</b>  | 0.21          | <b>0.002**</b>     | <b>0.39</b>      | <b>&lt;0.001**</b> | <b>0.34</b>   | <b>&lt;0.001**</b> | <b>0.2</b>    | <b>0.007‡</b> |
| e' (avg)       | -0.0026              | 0.97               | 0.0041        | 0.94        | -0.0091       | 0.88               | 0.078         | 0.18          | 0.094         | 0.11               | 0.058            | 0.42               | 0.082         | 0.19               | -0.029        | 0.63          |
| E/e' (avg)     | <b>0.24</b>          | <b>0.004**</b>     | -0.047        | 0.49        | <b>0.22</b>   | <b>0.001**</b>     | 0.086         | 0.21          | 0.047         | 0.50               | 0.21             | <b>0.02</b>        | 0.2           | <b>0.006**</b>     | <b>0.15</b>   | <b>0.04</b>   |
| LA strain†     | 0.11                 | 0.08               | -0.033        | 0.50        | -0.024        | 0.63               | -0.048        | 0.33          | -0.01         | 0.84               | 0.093            | 0.13               | -0.1          | 0.06               | 0.034         | 0.50          |
| LA volume      | 0.00088              | 0.99               | 0.033         | 0.58        | 0.025         | 0.68               | 0.054         | 0.36          | -0.087        | 0.15               | 0.01             | 0.89               | -0.067        | 0.29               | -0.042        | 0.50          |
| LAVI           | -0.033               | 0.67               | 0.044         | 0.48        | 0.017         | 0.79               | 0.042         | 0.50          | -0.067        | 0.28               | -0.019           | 0.81               | -0.024        | 0.71               | -0.036        | 0.58          |
| GLS            | 0.16                 | 0.06               | -0.08         | 0.24        | 0.033         | 0.63               | -0.065        | 0.34          | -0.11         | 0.10               | 0.12             | 0.18               | -0.096        | 0.19               | 0.1           | 0.16          |
| RV strain      | 0.13                 | 0.12               | -0.064        | 0.35        | -0.057        | 0.41               | <b>-0.15</b>  | <b>0.03</b>   | -0.16         | <b>0.02</b>        | 0.028            | 0.74               | -0.14         | 0.06               | 0.055         | 0.44          |
| TAPSE          | 0.094                | 0.27               | <b>-0.13</b>  | <b>0.05</b> | 0.025         | 0.71               | <b>-0.13</b>  | <b>0.06</b>   | -0.2          | <b>0.003**</b>     | -0.016           | 0.84               | <b>-0.19</b>  | <b>0.01*</b>       | -0.012        | 0.86          |
| RV S'          | 0.044                | 0.59               | <0.001        | 0.99        | -0.056        | 0.40               | -0.1          | 0.12          | -0.071        | 0.28               | 0.027            | 0.74               | -0.083        | 0.24               | 0.017         | 0.80          |
| TR-velocity    | <b>0.23</b>          | <b>0.02</b>        | -0.04         | 0.57        | -0.039        | 0.62               | <b>0.21</b>   | <b>0.007‡</b> | 0.29          | <b>&lt;0.001**</b> | <b>0.24</b>      | <b>0.02</b>        | <b>0.27</b>   | <b>&lt;0.001**</b> | 0.093         | 0.25          |

\*P-value no longer significant (>0.05) after additional adjustment for history of autoimmune disease or malignancy.

†LA reservoir strain

‡P<0.10 after correction for false discovery rate.

\*\*P<0.05 after correction for false discovery rate.

$\beta$  coef =  $\beta$  coefficient, standardized; P = P-value.

LVMI = left ventricular mass index; RWT = left ventricular relative wall thickness; avg = average between left ventricular septal and lateral wall; LA=left atrial;

LAVI = left atrial volume; GLS = LV global longitudinal strain; RV = right ventricular; TAPSE = tricuspid annular systolic excursion; TR= tricuspid velocity.

**Supplementary Table VII. Inflammation as a mediator between comorbidity score and cardiac structure/function in PROMIS-HFpEF**

| Mediator                             | Total effect       |                |         | Direct effect      |                |         | Indirect effect = mediated |               |                     |            |
|--------------------------------------|--------------------|----------------|---------|--------------------|----------------|---------|----------------------------|---------------|---------------------|------------|
|                                      | Effect ( $\beta$ ) | 95% CI         | P-value | Effect ( $\beta$ ) | 95% CI         | P-value | Effect ( $\beta$ )         | 95% CI        | P-value             | % mediated |
| <b>Outcome = Mitral E velocity</b>   |                    |                |         |                    |                |         |                            |               |                     |            |
| PC1                                  | 3.90               | 1.46 to 6.19   | 0.002   | 2.85               | 0.61 to 5.32   | 0.02    | 1.05                       | 0.40 to 2.16  | <b>0.002*</b> †     | 28%        |
| PC5                                  | 3.90               | 1.39 to 6.05   | 0.002   | 3.53               | 1.02 to 5.71   | 0.006   | 0.37                       | -0.08 to 1.20 | 0.14                | —          |
| PC6                                  | 3.90               | 1.58 to 6.27   | 0.004   | 3.18               | 0.54 to 5.51   | 0.01    | 0.72                       | 0.12 to 1.89  | <b>0.02*</b> †      | 19%        |
| Turquoise                            | 3.90               | 1.42 to 6.07   | <0.001  | 2.54               | 0.21 to 4.88   | 0.046   | 1.36                       | 0.61 to 2.44  | <b>&lt;0.001*</b> † | 35%        |
| Yellow                               | 3.90               | 1.54 to 6.32   | 0.002   | 2.75               | 0.36 to 5.13   | 0.02    | 1.15                       | 0.46 to 2.22  | <b>&lt;0.001*</b> † | 30%        |
| <b>Outcome = E/e' ratio</b>          |                    |                |         |                    |                |         |                            |               |                     |            |
| PC1                                  | 0.58               | 0.13 to 1.07   | 0.02    | 0.41               | -0.04 to 0.90  | 0.08    | 0.17                       | 0.05 to 0.35  | <b>0.006*</b> †     | 29%        |
| Turquoise                            | 0.56               | 0.09 to 1.08   | 0.02    | 0.41               | -0.03 to 0.90  | 0.08    | 0.15                       | 0.004 to 0.33 | <b>0.049</b> ‡      | 26%        |
| Yellow                               | 0.56               | 0.10 to 1.04   | 0.02    | 0.46               | 0.03 to 0.92   | 0.04    | 0.10                       | 0.01 to 0.37  | <b>0.046</b> ‡      | 18%        |
| <b>Outcome = TR-velocity</b>         |                    |                |         |                    |                |         |                            |               |                     |            |
| PC1                                  | 5.15               | -0.41 to 11.37 | 0.07    | 3.99               | -1.57 to 9.97  | 0.18    | 1.16                       | 0.23 to 2.79  | <b>0.02*</b> †      | 23%        |
| PC5                                  | 5.15               | -0.34 to 11.22 | 0.07    | 3.47               | -1.87 to 9.34  | 0.22    | 1.68                       | -0.02 to 4.45 | 0.08‡               | —          |
| PC6                                  | 5.15               | -0.51 to 10.88 | 0.08    | 3.06               | -2.10 to 8.85  | 0.27    | 2.10                       | 0.54 to 4.52  | <b>0.01*</b> †      | 41%        |
| Turquoise                            | 5.15               | -0.91 to 10.71 | 0.09    | 3.75               | -2.20 to 9.79  | 0.23    | 1.40                       | 0.18 to 3.32  | <b>0.04*</b> ‡      | 27%        |
| Yellow                               | 5.15               | -0.59 to 10.80 | 0.08    | 3.19               | -2.47 to 8.32  | 0.24    | 1.97                       | 0.53 to 4.03  | <b>&lt;0.001*</b> † | 38%        |
| <b>Outcome = RV free wall strain</b> |                    |                |         |                    |                |         |                            |               |                     |            |
| PC5                                  | -0.89              | -1.37 to -0.46 | <0.001  | -0.82              | -1.27 to -0.38 | <0.001  | -0.07                      | -0.21 to 0.01 | 0.15                | —          |
| PC6                                  | -0.89              | -1.37 to -0.42 | <0.001  | -0.81              | -1.33 to -0.36 | <0.001  | -0.08                      | -0.23 to 0.04 | 0.17                | —          |
| Yellow                               | -0.89              | -1.31 to -0.41 | <0.001  | -0.83              | -1.27 to -0.35 | 0.006   | -0.05                      | -0.18 to 0.03 | 0.24                | —          |
| <b>Outcome = TAPSE</b>               |                    |                |         |                    |                |         |                            |               |                     |            |
| PC5                                  | -0.06              | -0.10 to -0.03 | <0.001  | -0.06              | -0.09 to -0.03 | <0.001  | -0.004                     | -0.01 to 0.00 | 0.22                | —          |
| PC6                                  | -0.06              | -0.09 to -0.03 | <0.001  | -0.05              | -0.08 to -0.02 | <0.001  | -0.008                     | -0.02 to 0.00 | <b>0.03*</b> ‡      | 13%        |
| Yellow                               | -0.06              | -0.09 to -0.03 | <0.001  | -0.06              | -0.08 to -0.02 | <0.001  | -0.007                     | -0.02 to 0.00 | 0.06‡               | —          |

Mediators represent the principal component scores for PC's and the cluster eigengenes for clusters (represented by cluster color), respectively.

\*P<0.05 after additional adjustment for autoimmune disease and malignancy.

†P<0.05 after correction for false discovery rate.

‡P<0.10 after correction for false discovery rate.

$\beta$  =  $\beta$  coefficient; CI = confidence interval; TR = tricuspid regurgitation; RV = right ventricular; TAPSE = tricuspid annular plane systolic excursion.

**Supplementary Table VIII. Mediation analysis in PROMIS-HFpEF after exclusion of patients with heart failure and mid-range ejection fraction (EF < 50%)**

|                             |                   | PROMIS-HFpEF cohort - total<br>(N=228) |            | PROMIS-HFpEF cohort<br>excluding LVEF < 50%<br>(N=205) |            |
|-----------------------------|-------------------|----------------------------------------|------------|--------------------------------------------------------|------------|
| Echocardiographic parameter | Mediator          | P-value*                               | % mediated | P-value                                                | % mediated |
| Mitral E velocity           | PC1               | 0.002                                  | 28%        | 0.008                                                  | 26%        |
|                             | PC6               | 0.02                                   | 19%        | 0.03                                                   | 15%        |
|                             | Turquoise cluster | <0.001                                 | 35%        | 0.004                                                  | 32%        |
|                             | Yellow cluster    | <0.001                                 | 30%        | <0.001                                                 | 23%        |
| E/e' ratio                  | PC1               | 0.006                                  | 29%        | 0.01                                                   | 21%        |
|                             | Turquoise cluster | 0.049                                  | 26%        | <0.001                                                 | 20%        |
|                             | Yellow cluster    | 0.046                                  | 18%        | 0.006                                                  | 12%        |
| TR velocity                 | PC1               | 0.02                                   | 23%        | 0.008                                                  | 24%        |
|                             | PC6               | 0.01                                   | 41%        | 0.09                                                   | 33%        |
|                             | Turquoise cluster | 0.04                                   | 27%        | 0.08                                                   | 27%        |
|                             | Yellow cluster    | <0.001                                 | 38%        | 0.08                                                   | 31%        |
| TAPSE                       | PC6               | 0.03                                   | 13%        | <0.001                                                 | 8%         |

\*P-value for the indirect effect; i.e. the mediated effect.

Abbreviations: LVEF = left ventricular ejection fraction; PC = principal component; TR = tricuspid regurgitation; TAPSE = tricuspid annular plane systolic excursion

**Supplementary Table IX: Analysis of selected proteins as mediators of the association between comorbidity burden and echocardiographic hemodynamic parameters in PROMIS-HFpEF.**

| Protein | Mitral E                           |                                    |                                    |              | E/e' ratio                        |                                     |                                     |              | TR-velocity                         |                                     |                                    |             |
|---------|------------------------------------|------------------------------------|------------------------------------|--------------|-----------------------------------|-------------------------------------|-------------------------------------|--------------|-------------------------------------|-------------------------------------|------------------------------------|-------------|
|         | Total effect                       | Direct effect                      | Mediation effect                   | % Mediated * | Total effect                      | Direct effect                       | Mediation effect                    | % Mediated * | Total effect                        | Direct effect                       | Mediation effect                   | % Mediated* |
| IGFBP7  | 3.90<br>(1.51 to 6.11),<br>P=0.002 | 2.12<br>(-0.20 to 4.48),<br>P=0.08 | 1.78<br>(0.77 to 3.31),<br>P<0.001 | 46%          | 0.58<br>(0.14 to 1.05),<br>P=0.02 | 0.39<br>(-0.06 to 0.82),<br>P=0.09  | 0.19<br>(0.05 to 0.48),<br>P=0.004  | 33%          | 5.15<br>(-0.79 to 10.64),<br>P=0.09 | 2.11<br>(-3.54 to 7.62),<br>P=0.49  | 3.04<br>(1.20 to 6.82),<br>P<0.001 | 59%         |
| GDF15   | 3.90<br>(1.69 to 6.23),<br>P<0.001 | 2.28<br>(-0.26 to 4.76),<br>P=0.08 | 1.62<br>(0.67 to 3.30),<br>P<0.001 | 42%          | 0.58<br>(0.14 to 1.08),<br>P=0.02 | 0.42<br>(-0.04 to 0.90),<br>P=0.07  | 0.16<br>(0.0003 to 0.41),<br>P=0.08 | 27%          | 5.15<br>(-0.35 to 10.94),<br>P=0.07 | 1.84<br>(-3.61 to 7.33),<br>P=0.52  | 3.31<br>(1.04 to 6.67),<br>P=0.004 | 64%         |
| TNFR1   | 1.23<br>(0.43 to 2.48),<br>P<0.001 | 2.67<br>(0.10 to 4.72),<br>P=0.04  | 1.23<br>(0.43 to 2.48),<br>P<0.001 | 32%          | 0.58<br>(0.11 to 1.04),<br>P=0.01 | 0.38<br>(-0.10 to 0.87),<br>P=0.16  | 0.20<br>(0.03 to 0.38),<br>P=0.02   | 34%          | 5.15<br>(-0.12 to 11.81),<br>P=0.07 | 3.12<br>(-2.49 to 9.08),<br>P=0.27  | 2.03<br>(0.50 to 4.29),<br>P=0.02  | 39%         |
| UPAR    | 3.90<br>(1.64 to 6.13),<br>P=0.002 | 3.03<br>(0.55 to 5.45),<br>P=0.02  | 0.87<br>(0.32 to 2.42),<br>P=0.002 | 22%          | 0.58<br>(0.17 to 1.10),<br>P=0.01 | 0.48<br>(0.06 to 0.94),<br>P=0.03   | 0.11<br>(0.02 to 0.30),<br>P=0.04   | 18%          | 5.15<br>(-0.67 to 10.71),<br>P=0.07 | 3.68<br>(-2.05 to 9.15),<br>P=0.18  | 1.47<br>(0.40 to 3.37),<br>P=0.02  | 29%         |
| LTBR    | 3.90<br>(1.32 to 5.86),<br>P=0.002 | 3.03<br>(0.35 to 4.94),<br>P=0.01  | 0.87<br>(0.27 to 1.78),<br>P=0.002 | 22%          | 0.58<br>(0.14 to 1.11),<br>P=0.02 | 0.51<br>(0.04 to 1.03),<br>P=0.04   | 0.07<br>(-0.02 to 0.20),<br>P=0.10  | —            | 5.15<br>(-0.46 to 10.72),<br>P=0.08 | 4.15<br>(1.15 to 9.57),<br>P=0.15   | 1.001<br>(0.20 to 2.56),<br>P=0.02 | 19%         |
| IL1RT1  | 3.90<br>(1.45 to 6.19),<br>P<0.001 | 3.35<br>(0.66 to 5.64),<br>P=0.008 | 0.55<br>(0.07 to 1.52),<br>P=0.04  | 14%          | 0.58<br>(0.15 to 1.03),<br>P=0.02 | 0.56<br>(0.13 to 1.03),<br>P=0.02   | 0.02<br>(-0.03 to 0.13),<br>P=0.47  | —            | 5.15<br>(-0.86 to 10.96),<br>P=0.09 | 3.54<br>(-2.07 to 8.80),<br>P=0.23  | 1.60<br>(0.23 to 4.10),<br>P=0.03  | 31%         |
| PLC     | 3.90<br>(1.79 to 6.10),<br>P<0.001 | 2.25<br>(-0.34 to 4.54),<br>P=0.10 | 1.65<br>(0.56 to 3.05),<br>P<0.001 | 42%          | 0.58<br>(0.18 to 1.09),<br>P=0.01 | 0.41<br>(-0.010 to 0.90),<br>P=0.08 | 0.17<br>(-0.01 to 0.41),<br>P=0.08  | —            | 5.15<br>(-0.90 to 11.05),<br>P=0.09 | 4.93<br>(-1.65 to 11.05),<br>P=0.08 | 0.22<br>(-1.40 to 2.27),<br>P=0.82 | —           |

| Protein | Mitral E                           |                                    |                                     |              | E/e' ratio                         |                                    |                                       |              | TR-velocity                          |                                     |                                     |             |
|---------|------------------------------------|------------------------------------|-------------------------------------|--------------|------------------------------------|------------------------------------|---------------------------------------|--------------|--------------------------------------|-------------------------------------|-------------------------------------|-------------|
|         | Total effect                       | Direct effect                      | Mediation effect                    | % Mediated * | Total effect                       | Direct effect                      | Mediation effect                      | % Mediated * | Total effect                         | Direct effect                       | Mediation effect                    | % Mediated* |
| TNFSF14 | 3.90<br>(1.74 to 6.17),<br>P<0.001 | 4.00<br>(1.73 to 6.33),<br>P<0.001 | -0.10<br>(-0.56 to 0.11),<br>P=0.49 | —            | 0.58<br>(0.14 to 1.08),<br>P=0.004 | 0.60<br>(0.17 to 1.09),<br>P=0.002 | -0.02<br>(-0.12 to 0.03),<br>P=0.56   | —            | 5.15<br>(-0.40 to 11.04), P<br>=0.07 | 5.30<br>(-0.19 to 11.05),<br>P=0.06 | -0.15<br>(-1.92 to 0.12),<br>P=0.58 | —           |
| Notch3  | 3.90<br>(1.45 to 6.17),<br>P=0.002 | 3.77<br>(1.52 to 5.93),<br>0.002   | 0.13<br>(-0.33 to 0.61),<br>P=0.55  | —            | 0.58<br>(0.14 to 1.09),<br>P=0.02  | 0.58<br>(0.15 to 1.11),<br>P=0.02  | -0.0004<br>(-0.05 to 0.06),<br>P=0.97 | —            | 5.15<br>(-0.20 to 11.43),<br>P=0.07  | 4.71<br>(-0.32 to 11.09),<br>P=0.10 | 0.44<br>(-0.08 to 1.45),<br>P=0.18  | —           |
| VEGFA   | 3.90<br>(1.71 to 6.28),<br>P<0.001 | 3.17<br>(0.70 to 5.68),<br>P=0.004 | 0.73<br>(-0.10 to 1.86),<br>P=0.12  | —            | 0.58<br>(0.12 to 1.09),<br>P=0.02  | 0.54<br>(0.09 to 1.07),<br>P=0.04  | 0.04<br>(-0.12 to 0.18),<br>P=0.65    | —            | 5.15<br>(-0.76 to 11.16),<br>P=0.09  | 4.84<br>(-1.30 to 10.92),<br>P=0.13 | 0.31<br>(-1.05 to 1.88),<br>P=0.71  | —           |
| FABP4   | 3.90<br>(1.81 to 6.08),<br>P<0.001 | 3.71<br>(1.13 to 6.22),<br>P<0.001 | 0.18<br>(-1.13 to 1.54),<br>P=0.72  | —            | 0.58<br>(0.13 to 1.08),<br>P=0.01  | 0.72<br>(0.26 to 1.21),<br>P=0.004 | -0.14<br>(-0.34 to 0.10),<br>P=0.18   | —            | 5.15<br>(-0.90 to 11.11),<br>P=0.10  | 5.23<br>(-1.54 to 11.61),<br>P=0.14 | -0.08<br>(-2.15 to 2.00),<br>P=0.97 | —           |
| IL6     | 3.90<br>(1.67 to 6.19),<br>P<0.001 | 3.39<br>(1.10 to 5.66),<br>P=0.004 | 0.50<br>(-0.03 to 1.38),<br>P=0.12  | —            | 0.58<br>(0.14 to 1.07),<br>P=0.02  | 0.51<br>(0.02 to 1.04),<br>P=0.05  | 0.07<br>(-0.04 to 0.22),<br>P=0.19    | —            | 5.15<br>(-0.94 to 11.57),<br>P=0.10  | 4.37<br>(-1.53 to 10.37),<br>P=0.12 | 0.78<br>(-0.20 to 2.99),<br>P=0.22  | —           |
| ICAM2   | 3.90<br>(1.56 to 6.30),<br>P=0.002 | 3.80<br>(1.42 to 6.23),<br>P=0.002 | 0.10<br>(-0.07 to 0.62),<br>P=0.41  | —            | 0.58<br>(0.11 to 1.08),<br>P=0.02  | 0.58<br>(0.11 to 1.08),<br>P=0.02  | 0.001<br>(-0.05 to 0.06),<br>P=0.98   | —            | 5.15<br>(0.02 to 10.91),<br>P=0.06   | 5.12<br>(-0.06 to 10.84),<br>P=0.06 | 0.04<br>(-0.66 to 0.73),<br>P=0.93  | —           |
| IL10RB  | 3.90<br>(1.46 to 6.19),<br>P<0.001 | 3.44<br>(0.98 to 5.68),<br>P=0.008 | 0.46<br>(-0.12 to 1.37),<br>P=0.14  | —            | 0.58<br>(0.14 to 1.03),<br>P=0.008 | 0.54<br>(0.08 to 1.00),<br>P=0.03  | 0.04<br>(-0.01 to 0.17),<br>P=0.24    | —            | 5.15<br>(-0.75 to 10.87),<br>P=0.09  | 4.71<br>(-1.23 to 10.50),<br>P=0.12 | 0.44<br>(-0.04 to 1.80),<br>P=0.16  | —           |
| MCP1    | 3.90<br>(1.63 to 6.11),<br>P<0.001 | 3.87<br>(1.59 to 6.10),<br>P<0.001 | 0.03<br>(-0.15 to 0.53),<br>P=0.84  | —            | 0.58<br>(0.12 to 1.08),<br>P=0.01  | 0.58<br>(0.12 to 1.09),<br>P=0.02  | -0.002<br>(-0.08 to 0.04),<br>P=0.94  | —            | 5.15<br>(-0.59 to 10.74),<br>P=0.09  | 5.02<br>(-0.55 to 10.73),<br>P=0.09 | 0.14<br>(-0.51 to 0.71),<br>P=0.71  | —           |



Values for total, direct and indirect effect indicate the  $\beta$  coefficient (95% confidence interval), P-value.

\* Only provided when the mediated effect was significant.

Abbreviations: TR = tricuspid regurgitation; for abbreviations of biomarkers, see Supplementary Table 1.

**Supplementary Table X. Association between systemic inflammation and measures of coronary microvascular disease, peripheral endothelial function, and exercise capacity**

| Inflammation protein PC/cluster | Coronary flow reserve |              |                        |                         | Reactive hyperemia index |         |                        |         | 6MWT distance      |                  |                        |                  |
|---------------------------------|-----------------------|--------------|------------------------|-------------------------|--------------------------|---------|------------------------|---------|--------------------|------------------|------------------------|------------------|
|                                 | Minimally-adjusted    |              | Multivariable-adjusted |                         | Minimally-adjusted       |         | Multivariable-adjusted |         | Minimally-adjusted |                  | Multivariable-adjusted |                  |
|                                 | $\beta$ -coef         | P-value      | $\beta$ -coef          | P-value                 | $\beta$ -coef            | P-value | $\beta$ -coef          | P-value | $\beta$ -coef      | P-value          | $\beta$ -coef          | P-value          |
| PC1                             | -0.12                 | 0.10         | -0.11                  | 0.26                    | -0.043                   | 0.43    | -0.035                 | 0.48    | -0.29              | <b>&lt;0.001</b> | -0.35                  | <b>&lt;0.001</b> |
| PC2                             | -0.12                 | 0.14         | -0.10                  | 0.20                    | -0.052                   | 0.38    | -0.052                 | 0.37    | -0.093             | 0.19             | -0.079                 | 0.24             |
| PC3                             | -0.063                | 0.40         | -0.072                 | 0.34                    | -0.072                   | 0.20    | -0.083                 | 0.31    | -0.15              | <b>0.02</b>      | -0.19                  | <b>0.002</b>     |
| PC4                             | -0.024                | 0.75         | -0.064                 | 0.41                    | -0.044                   | 0.44    | -0.046                 | 0.42    | -0.031             | 0.66             | 0.011                  | 0.88             |
| PC5                             | -0.22                 | <b>0.003</b> | -0.19                  | <b>0.01<sup>†</sup></b> | -0.075                   | 0.18    | -0.068                 | 0.40    | -0.16              | <b>0.02</b>      | -0.19                  | <b>0.003</b>     |
| PC6                             | -0.2                  | <b>0.009</b> | -0.18                  | <b>0.02*</b>            | -0.008                   | 0.88    | 0.0047                 | 0.92    | -0.24              | <b>&lt;0.001</b> | -0.19                  | <b>0.003</b>     |
| Turquoise                       | -0.12                 | 0.10         | -0.15                  | 0.14                    | -0.045                   | 0.41    | -0.046                 | 0.40    | -0.33              | <b>&lt;0.001</b> | -0.42                  | <b>&lt;0.001</b> |
| Yellow                          | -0.21                 | <b>0.007</b> | -0.18                  | <b>0.03</b>             | -0.036                   | 0.53    | -0.013                 | 0.76    | -0.33              | <b>&lt;0.001</b> | -0.27                  | <b>&lt;0.001</b> |
| Red                             | -0.12                 | 0.09         | -0.10                  | 0.18                    | -0.083                   | 0.13    | -0.080                 | 0.35    | -0.13              | <b>0.04</b>      | -0.078                 | 0.25             |

Minimally-adjusted models: covariate = study site.

Multivariable-adjusted models: covariates = age, gender, GFR, and study site.

\*P-value <0.05 after additional adjustment for smoking, history of coronary artery disease, and E/e' ratio.

†P-value <0.01 after additional adjustment for smoking, history of coronary artery disease, and E/e' ratio.

Abbreviations:  $\beta$ -coef = beta-coefficient; reactive hyperemia index = marker of peripheral endothelial function measured by EndoPAT; 6MWT = six minute walk test; PC = principal component.

**Supplementary Table XI: Comparison of characteristics of HFpEF patients versus (1) controls in the Northwestern University validation cohort, and (2) HFpEF patients in the PROMIS-HFpEF cohort**

| Characteristic                                   | Northwestern University cohort |                        |          | PROMIS-HFpEF           |          |
|--------------------------------------------------|--------------------------------|------------------------|----------|------------------------|----------|
|                                                  | Controls (n=30)                | HFpEF patients (n=117) | P-value† | HFpEF patients (n=228) | P-value‡ |
| Age, years                                       | 67 (58-73)                     | 70 (61-78)             | 0.16     | 75 (70-81)             | <0.001   |
| Female, n(%)                                     | 10 (33.3)                      | 76 (65.0)              | 0.003    | 129 (56.3)             | 0.13     |
| Race, n(%)                                       |                                |                        | 0.58     |                        | 0.22     |
| -White                                           | 15 (88.2)                      | 59 (80.8)              |          | 200 (87.3)             |          |
| -African-American                                | 0 (0)                          | 7 (9.6)                |          | 10 (4.4)               |          |
| -Other                                           | 2 (11.8)                       | 7 (9.6)                |          | 19 (8.3)               |          |
| BMI, kg/m <sup>2</sup>                           | 27.1<br>(24.6-32.7)            | 32.2<br>(26.5-41.6)    | 0.001    | 28.1<br>(24.4-32.4)    | <0.001   |
| Obesity (BMI ≥30 kg/m <sup>2</sup> ), n(%)*      | 11 (40.7)                      | 72 (61.5)              | 0.06     | 85 (37.1)              | <0.001   |
| Heart rate, bpm                                  | 76 (60-78)                     | 70 (62-76)             | 0.51     | 69 (61-79)             | 0.97     |
| Systolic BP, mmHg                                | 126<br>(114-138)               | 124<br>(112-133)       | 0.48     | 139<br>(125-152)       | <0.001   |
| Diastolic BP, mmHg                               | 73 (66-80)                     | 70 (61-80)             | 0.29     | 77 (69-85)             | <0.001   |
| Hypertension, n(%)*                              | 19 (67.9)                      | 91 (78.4)              | 0.32     | 190 (83.0)             | 0.31     |
| Hyperlipidemia, n(%)*                            | 16 (57.1)                      | 72 (62.1)              | 0.67     | 121 (52.8)             | 0.11     |
| Diabetes mellitus, n(%)*                         | 5 (17.9)                       | 44 (37.9)              | 0.048    | 63 (27.5)              | 0.05     |
| Coronary artery disease, n(%)*                   | 19 (67.9)                      | 51 (44.0)              | 0.03     | 48 (21.0)              | <0.001   |
| Stroke, n(%)*                                    | 1 (3.6)                        | 9 (7.8)                | 0.69     | 26 (11.4)              | 0.35     |
| Anemia, n(%)*                                    | 4 (14.8)                       | 46 (39.7)              | 0.02     | 79 (34.5)              | 0.41     |
| Comorbidity score                                | 3 (2-4)                        | 4 (2-4)                | 0.50     | 3 (2-4)                | 0.83     |
| Atrial fibrillation, n(%)*                       | 20 (66.7)                      | 54 (46.2)              | 0.07     | 131 (57.2)             | 0.05     |
| Sodium, mmol/L                                   | 138<br>(137-139)               | 139<br>(137-140)       | 0.25     | 140<br>(138-142)       | <0.001   |
| Potassium, mmol/L                                | 3.9 (3.7-4.2)                  | 4.0 (3.7-4.4)          | 0.40     | 4.2 (3.9-4.5)          | 0.001    |
| BUN, mg/dL                                       | 16.0<br>(12.0-19.1)            | 21.6<br>(15.1-28.0)    | 0.001    | 22.4<br>(17.1-26.7)    | 0.37     |
| Creatinine, mg/dL                                | 1.06<br>(0.85-1.23)            | 1.19<br>(0.97-1.60)    | 0.008    | 1.05<br>(0.86-1.33)    | 0.93     |
| GFR, mL/min/1.73 m <sup>2</sup>                  | 61 (59-61)                     | 59 (45-61)             | 0.003    | 59 (46-73)             | <0.001   |
| BNP, pg/ml                                       | 44<br>(18-81)                  | 120<br>(45-269)        | 0.08     | —                      | —        |
| NT-proBNP, pg/ml                                 | —                              | —                      | —        | 1480<br>(827-2518)     | —        |
| Hemoglobin, g/dL                                 | 14.5<br>(12.4-15.0)            | 12.7<br>(11.3-13.7)    | <0.001   | 13.0<br>(11.9-14.0)    | 0.04     |
| White blood cell count, K/mm <sup>3</sup>        | 6.7 (5.7-8.3)                  | 6.8 (5.4-8.3)          | 0.85     | 6.6 (5.5-7.8)          | 0.36     |
| Platelet count, K/mm <sup>3</sup>                | 231<br>(181-300)               | 230<br>(192-272)       | 0.79     | 221<br>(182-252)       | 0.16     |
| ACE-inhibitor                                    | 6 (22.2)                       | 26 (22.4)              | 1.0      | 72 (31.4)              | 0.10     |
| ARB                                              | 7 (25.9)                       | 22 (19.0)              | 0.43     | 100 (43.7)             | <0.001   |
| Beta-blocker                                     | 13 (48.1)                      | 69 (60.0)              | 0.29     | 176 (76.9)             | 0.002    |
| MRA                                              | 0 (0)                          | 54 (46.6)              | <0.001   | 63 (27.5)              | 0.001    |
| Loop diuretic                                    | 1 (3.7)                        | 83 (71.6)              | <0.001   | 125 (54.6)             | 0.002    |
| Thiazide diuretic                                | 9 (33.3)                       | 16 (13.8)              | 0.02     | 26 (11.4)              | 0.60     |
| Statin                                           | 21 (77.8)                      | 67 (57.8)              | 0.08     | 131 (57.2)             | 1.0      |
| Antiplatelet agent                               | 17 (63.0)                      | 68 (58.6)              | 0.83     | 59 (25.8)              | <0.001   |
| LV ejection fraction, %                          | 64 (61-70)                     | 64 (58-69)             | 0.29     | 59 (55-64)             | <0.001   |
| LV end-diastolic volume index, ml/m <sup>2</sup> | 37.3<br>(32.8-46.1)            | 35.1<br>(29.1-43.3)    | 0.78     | 41.2<br>(33.4-50.1)    | <0.001   |

| Characteristic                                  | Northwestern University cohort |                           |              | PROMIS-HFpEF                 |              |
|-------------------------------------------------|--------------------------------|---------------------------|--------------|------------------------------|--------------|
|                                                 | Controls<br>(n=30)             | HFpEF patients<br>(n=117) | P-<br>value† | HFpEF<br>patients<br>(n=228) | P-<br>value‡ |
| LV end-systolic volume index, ml/m <sup>2</sup> | 13.2<br>(10.2-17.3)            | 13.1<br>(10.1-16.6)       | 0.23         | 16.7<br>(12.6-21.1)          | <0.001       |
| LV mass index, g/m <sup>2</sup>                 | 85 (68-110)                    | 85 (69-105)               | 0.70         | 103 (84-125)                 | <0.001       |
| LV mass, g                                      | 165<br>(130-228)               | 184<br>(138-217)          | 0.43         | 198<br>(162-245)             | 0.03         |
| Relative wall thickness                         | 0.47<br>(0.40-0.54)            | 0.48<br>(0.39-0.54)       | 0.76         | 0.45<br>(0.39-0.52)          | 0.27         |
| LA volume index, ml/m <sup>2</sup>              | 23.0<br>(17.3-27.5)            | 26.0<br>(20.1-34.1)       | 0.04         | 38.4<br>(30.7-45.1)          | <0.001       |
| LA volume, ml                                   | 40.8<br>(33.1-55.0)            | 52.5<br>(41.5-71.0)       | 0.09         | 74.0<br>(57.5-89.3)          | <0.001       |
| Mitral E velocity, cm/s                         | 74 (58-94)                     | 95 (74-117)               | 0.01         | 94 (80-115)                  | 0.95         |
| e' (average), cm/s                              | 7.6 (6.3-9.8)                  | 7.7 (6.0-9.3)             | 0.75         | 8.2 (6.6-10.0)               | 0.03         |
| E/e' ratio (average)                            | 10.2<br>(7.1-12.4)             | 12.3<br>(9.1-16.0)        | 0.08         | 12.2<br>(9.2-16.2)           | 1.0          |
| RVEDA index, cm <sup>2</sup> /m <sup>2</sup>    | 89 (71-107)                    | 85 (71-99)                | 0.52         | 97 (82-113)                  | <0.001       |
| RVESA index, cm <sup>2</sup> /m <sup>2</sup>    | 51 (42-70)                     | 49 (40-59)                | 0.61         | 56 (47-71)                   | <0.001       |
| RV wall thickness, cm                           | 0.46<br>(0.39-0.50)            | 0.55<br>(0.50-0.66)       | 0.009        | 0.48<br>(0.44-0.54)          | <0.001       |
| TAPSE, cm                                       | 1.9 (1.7-2.1)                  | 1.9 (1.4-2.2)             | 0.78         | 1.8 (1.6-2.1)                | 0.39         |
| TR velocity, cm/s                               | 210 (177-230)                  | 288 (246-325)             | <0.001       | 297 (267-329)                | <0.001       |

Values depict median (25<sup>th</sup>-75<sup>th</sup> percentile) for continuous variables and frequency (percentage) for categorical variables.

\*Comorbidities included in the comorbidity score

†Comparing HFpEF patients versus controls in the Northwestern University validation cohort

‡Comparing HFpEF patients from the PROMIS study (derivation cohort) with HFpEF patients from the Northwestern University cohort (validation cohort)

Abbreviations: BMI = body mass index; BP = blood pressure; HF = heart failure; BUN = blood urea nitrogen; BNP = B-type natriuretic peptide; NT-proBNP = N-terminal pro-B-type natriuretic peptide; GFR = glomerular filtration rate; ACE = angiotensinogen converting enzyme; ARB = angiotensin II receptor blocker; MRA = mineralocorticoid receptor antagonist; LV = left ventricular; LA = left atrial; RV = right ventricular; RVEDA = right ventricular end-diastolic area; RVESA = right ventricular end-systolic area; TAPSE = tricuspid annular plane systolic excursion; TR = tricuspid regurgitation

**Supplementary Table XII. Association between comorbidity burden and systemic inflammation in the Northwestern HFpEF patients**

| Dependent variable | Unadjusted                                 |             | Adjusted*    |
|--------------------|--------------------------------------------|-------------|--------------|
|                    | Standardized $\beta$ -coefficient (95% CI) | P-value     | P-value      |
| PC1                | 0.21 (0.04 to 0.39)                        | <b>0.02</b> | 0.37         |
| PC2                | 0.14 (-0.04 to 0.32)                       | 0.14        | 0.17         |
| PC3                | -0.07 (-0.26 to 0.11)                      | 0.44        | 0.36         |
| PC4                | 0.11 (-0.06 to 0.29)                       | 0.23        | 0.44         |
| PC5                | -0.03 (-0.21 to 0.15)                      | 0.75        | 0.33         |
| PC6                | -0.09 (-0.28 to 0.10)                      | 0.33        | 0.38         |
| Red                | 0.08 (-0.10 to 0.27)                       | 0.37        | 0.51         |
| Yellow             | 0.17 (-0.007 to 0.35)                      | 0.06        | 0.67         |
| Turquoise          | 0.23 (0.05 to 0.41)                        | <b>0.01</b> | <b>0.049</b> |

\*Adjusted for age, gender and GFR

Abbreviations: PC = principal component.

**Supplementary Table XIII.A. Unadjusted associations between inflammation PCs/clusters and cardiac structure/function in the Northwestern HFpEF patients**

| Dependent variable | PC1           |              | PC2           |              | PC3           |         | PC4           |              | PC5           |         | PC6           |         | Turquoise     |         |
|--------------------|---------------|--------------|---------------|--------------|---------------|---------|---------------|--------------|---------------|---------|---------------|---------|---------------|---------|
|                    | $\beta$ -coef | P-value      | $\beta$ -coef | P-value      | $\beta$ -coef | P-value | $\beta$ -coef | P-value      | $\beta$ -coef | P-value | $\beta$ -coef | P-value | $\beta$ -coef | P-value |
| LVMi               | 0.17          | 0.08         | -0.07         | 0.47         | 0.07          | 0.47    | -0.19         | 0.05         | -0.002        | 0.98    | 0.05          | 0.60    | 0.13          | 0.32    |
| RWT                | 0.06          | 0.53         | 0.02          | 0.85         | -0.05         | 0.63    | 0.11          | 0.26         | -0.14         | 0.14    | 0.09          | 0.37    | 0.05          | 0.71    |
| Mitral E           | 0.28          | <b>0.003</b> | -0.16         | 0.11         | 0.07          | 0.45    | 0.006         | 0.95         | 0.09          | 0.34    | -0.01         | 0.91    | 0.22          | 0.09    |
| e' (avg)           | -0.03         | 0.76         | 0.16          | 0.10         | 0.01          | 0.88    | 0.09          | 0.33         | -0.02         | 0.81    | 0.09          | 0.38    | -0.10         | 0.47    |
| E/e' (avg)         | 0.19          | 0.06         | -0.15         | 0.13         | 0.03          | 0.78    | -0.03         | 0.72         | 0.05          | 0.61    | -0.03         | 0.74    | 0.21          | 0.12    |
| LA volume          | 0.22          | <b>0.02</b>  | -0.16         | 0.09         | -0.05         | 0.57    | -0.16         | 0.09         | 0.15          | 0.13    | 0.009         | 0.93    | 0.14          | 0.28    |
| LAVI               | 0.17          | 0.08         | -0.30         | <b>0.002</b> | -0.10         | 0.29    | -0.19         | <b>0.046</b> | 0.10          | 0.30    | 0.01          | 0.88    | 0.09          | 0.50    |
| TAPSE              | -0.07         | 0.46         | 0.10          | 0.32         | 0.12          | 0.23    | -0.13         | 0.18         | -0.11         | 0.25    | 0.07          | 0.47    | 0.02          | 0.90    |
| TR-velocity        | 0.12          | 0.26         | -0.21         | <b>0.04</b>  | 0.04          | 0.72    | 0.07          | 0.52         | 0.15          | 0.15    | 0.04          | 0.71    | 0.12          | 0.41    |

$\beta$ -coef = beta coefficient, standardized

PC1-PC6 = principal components of inflammatory circulating biomarkers; Turquoise, Yellow and Red = clusters of inflammatory biomarkers following network analysis.

Abbreviations: LVMi = left ventricular mass index; RWT = left ventricular relative wall thickness; avg = average between left ventricular septal and lateral walls; LA=left atrial; LAVI = left atrial volume; TAPSE = tricuspid annular systolic excursion; TR= tricuspid velocity.

**Supplementary Table XIII.B. Multivariable-adjusted associations between inflammation PCs/clusters and cardiac structure/function in the Northwestern HFpEF patients**

| Dependent variable | PC1           |             | PC2           |             | PC3           |         | PC4           |              | PC5           |         | PC6           |         | Turquoise     |         |
|--------------------|---------------|-------------|---------------|-------------|---------------|---------|---------------|--------------|---------------|---------|---------------|---------|---------------|---------|
|                    | $\beta$ -coef | P-value     | $\beta$ -coef | P-value     | $\beta$ -coef | P-value | $\beta$ -coef | P-value      | $\beta$ -coef | P-value | $\beta$ -coef | P-value | $\beta$ -coef | P-value |
| LVMI               | 0.15          | 0.28        | -0.03         | 0.77        | 0.05          | 0.59    | -0.23         | <b>0.02</b>  | -0.03         | 0.78    | 0.08          | 0.41    | 0.13          | 0.32    |
| RWT                | 0.12          | 0.39        | 0.18          | 0.09        | -0.06         | 0.50    | 0.11          | 0.25         | -0.13         | 0.17    | 0.10          | 0.30    | 0.05          | 0.71    |
| Mitral E           | 0.31          | <b>0.03</b> | -0.14         | 0.19        | 0.05          | 0.61    | -0.005        | 0.96         | 0.06          | 0.54    | -0.02         | 0.81    | 0.22          | 0.09    |
| e' (avg)           | -0.03         | 0.84        | 0.06          | 0.57        | 0.008         | 0.93    | 0.08          | 0.42         | -0.02         | 0.79    | 0.13          | 0.17    | -0.08         | 0.52    |
| E/e' (avg)         | 0.24          | 0.08        | -0.07         | 0.52        | 0.02          | 0.81    | -0.03         | 0.74         | 0.04          | 0.71    | -0.05         | 0.59    | 0.20          | 0.12    |
| LA volume          | 0.13          | 0.36        | -0.16         | 0.11        | -0.06         | 0.49    | -0.25         | <b>0.008</b> | 0.09          | 0.32    | 0.04          | 0.65    | 0.14          | 0.28    |
| LAVI               | 0.07          | 0.58        | -0.21         | <b>0.03</b> | -0.12         | 0.18    | -0.25         | <b>0.005</b> | 0.07          | 0.45    | 0.03          | 0.71    | 0.09          | 0.49    |
| TAPSE              | 0.06          | 0.66        | -0.04         | 0.69        | 0.14          | 0.14    | -0.07         | 0.46         | -0.10         | 0.29    | 0.03          | 0.72    | 0.02          | 0.90    |
| TR-velocity        | 0.07          | 0.65        | -0.18         | 0.12        | 0.02          | 0.85    | 0.03          | 0.75         | 0.14          | 0.19    | 0.03          | 0.74    | 0.12          | 0.41    |

$\beta$ -coef = beta coefficient, standardized

All regression models were adjusted for age, gender, and GFR; models for LA volume, LAVI, e', and E/e' were additionally adjusted for atrial fibrillation.

Abbreviations: LVMI = left ventricular mass index; RWT = left ventricular relative wall thickness; avg = average between left ventricular septal and lateral walls; LA=left atrial; LAVI = left atrial volume; PC = principal component; TAPSE = tricuspid annular systolic excursion; TR= tricuspid velocity.
